# Supplementary material for: α-(Imino)pyridyldifluoroethyl Phosphonates: Novel Promising Building Blocks in Synthesis of Biorelevant Aminophosphonic Acids Derivatives
Source: MDPI journal article supplement (doi:10.3390/org2020007), 2021-04-23
Supplement: s1 [file s1]

Article

# $\alpha$ -(Imino)pyridyldifluoroethyl Phosphonates: Novel Promising Building Blocks in Synthesis of Biorelevant Aminophosphonic Acids Derivatives

Oksana M. Shavrina <sup>1</sup>, Lyudmyla V. Bezgubenko <sup>1</sup>, Andrii V. Bezdudny <sup>1</sup>, Petro P. Onys'ko <sup>1,\*</sup> and Yuliya V. Rassukana <sup>1,2</sup>

<sup>1</sup> Institute of Organic Chemistry, National Academy of Sciences of Ukraine, 5 Murmans'ka Str., Kyiv 02660, Ukraine; petruk94oksana@ukr.net (O.M.S.); bezgubenko@ukr.net (L.V.B.); bezdudny@ioch.kiev.ua (A.V.B.); juravi@ioch.kiev.ua (Y.V.R.)

<sup>2</sup> Department of Organic Chemistry, National Technical University of Ukraine "Kyiv Polytechnic Institute", 37, Prospect Peremogy, Kyiv 03056, Ukraine

\* Correspondence: onysko@ioch.kiev.ua

## Supporting information

<sup>1</sup>H, <sup>19</sup>F, and <sup>13</sup>C NMR spectra were recorded using Bruker Avance NMR spectrometers operating at 302, 400 and 499.8 <sup>1</sup>H frequencies; 75.8, 125.7 and 150.8 MHz for <sup>13</sup>C experiments; 188, 376.5 and 470.3 MHz for <sup>19</sup>F; 81 and 202.3 MHz for <sup>31</sup>P. Chemical shifts are reported relative to internal TMS (<sup>1</sup>H) or CFCl<sub>3</sub> (<sup>19</sup>F) and external 85%-H<sub>3</sub>PO<sub>4</sub> (<sup>31</sup>P) standards. Melting points are uncorrected. Solvents were dried before use according to standard methods. Elemental analysis was carried out in the analytical laboratory of Institute of Organic Chemistry, NAS of Ukraine.

### Diethyl (2,2-difluoro-1-imino-2-(pyridin-2-yl)ethyl)phosphonate **2a**

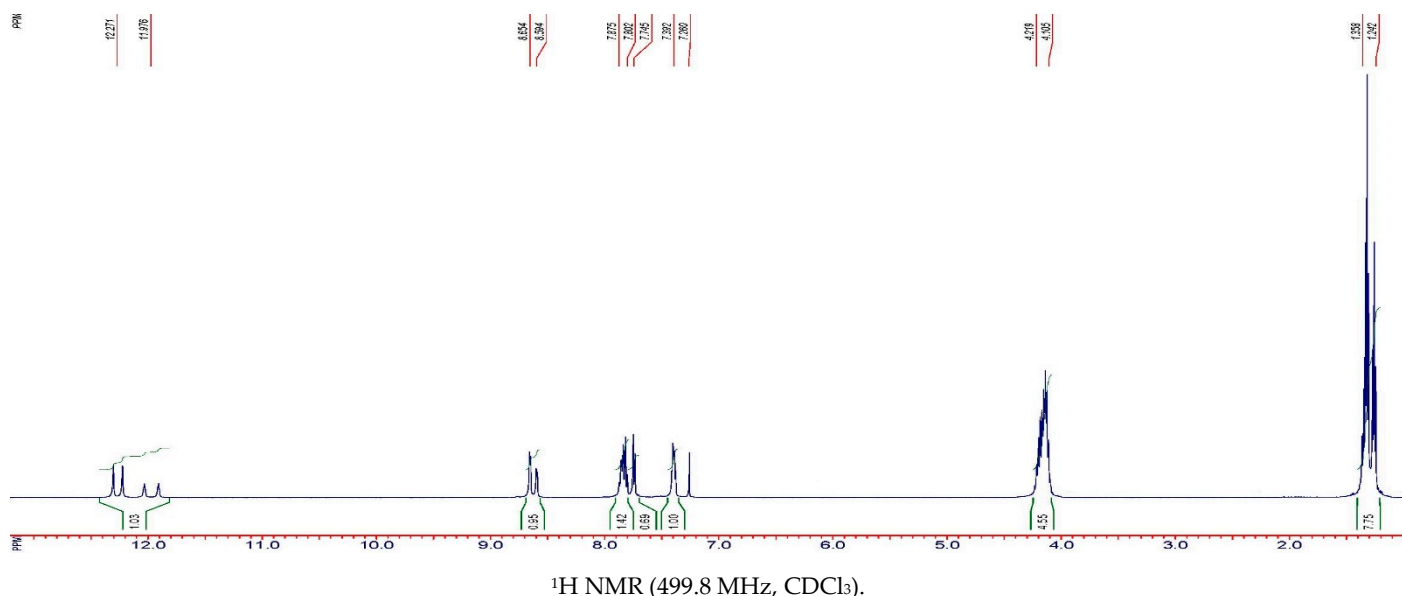

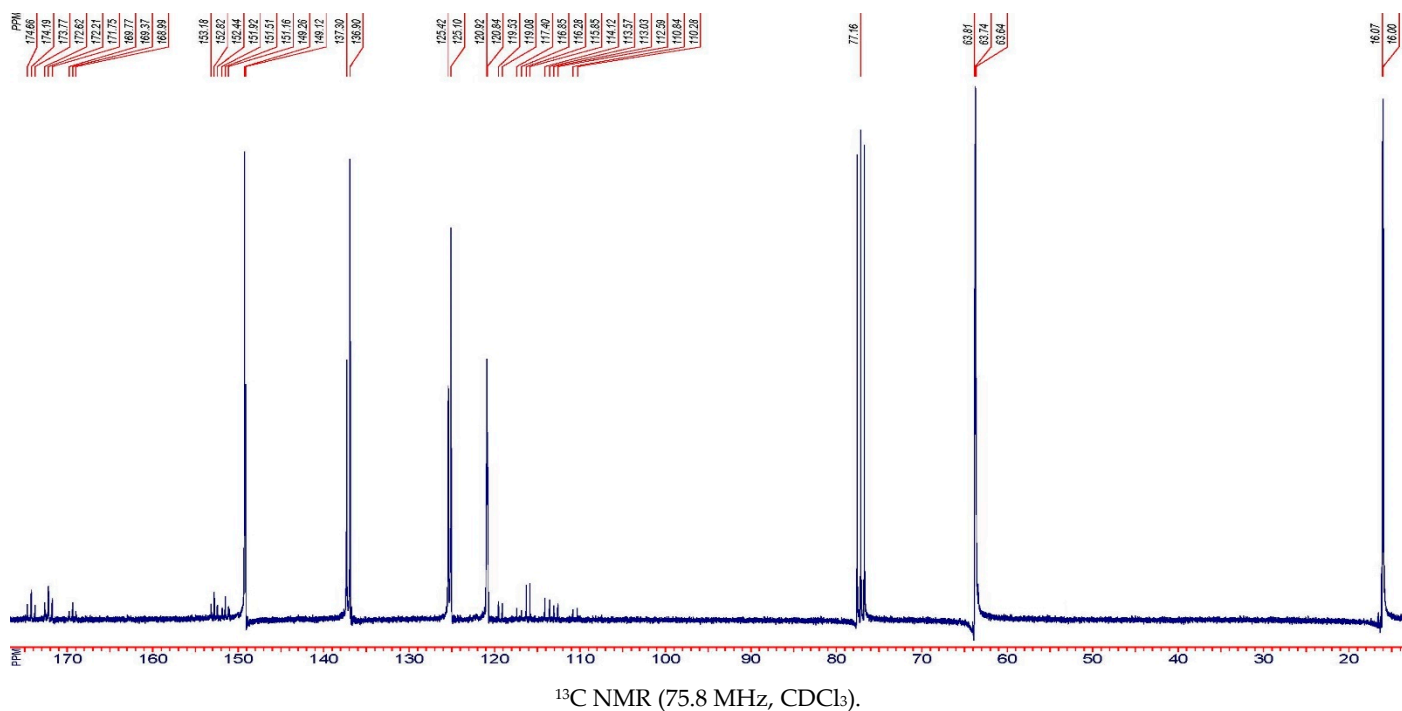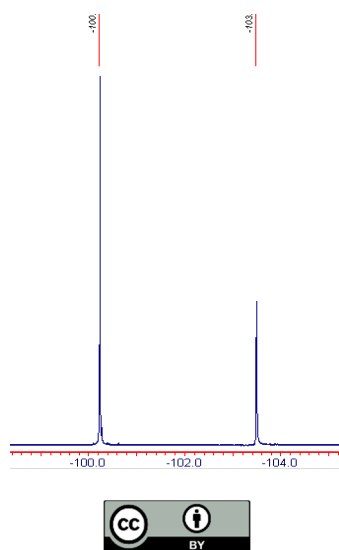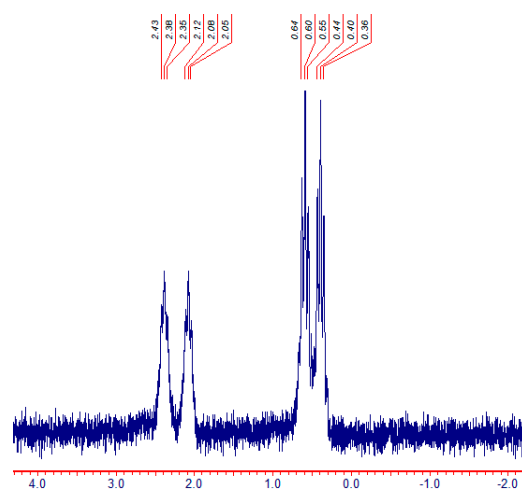

Copyright: © 2021 by the authors. Licensee MDPI, Basel, Switzerland. This article is an open access article distributed under the terms and conditions of the Creative Commons Attribution (CC BY) license (<http://creativecommons.org/licenses/by/4.0/>).

<sup>19</sup>F NMR (470.3 MHz, CDCl<sub>3</sub>)

<sup>31</sup>P NMR (202.3 MHz, CDCl<sub>3</sub>)

*Diethyl (2,2-difluoro-1-imino-2-(pyridin-3-yl)ethyl)phosphonate 2b*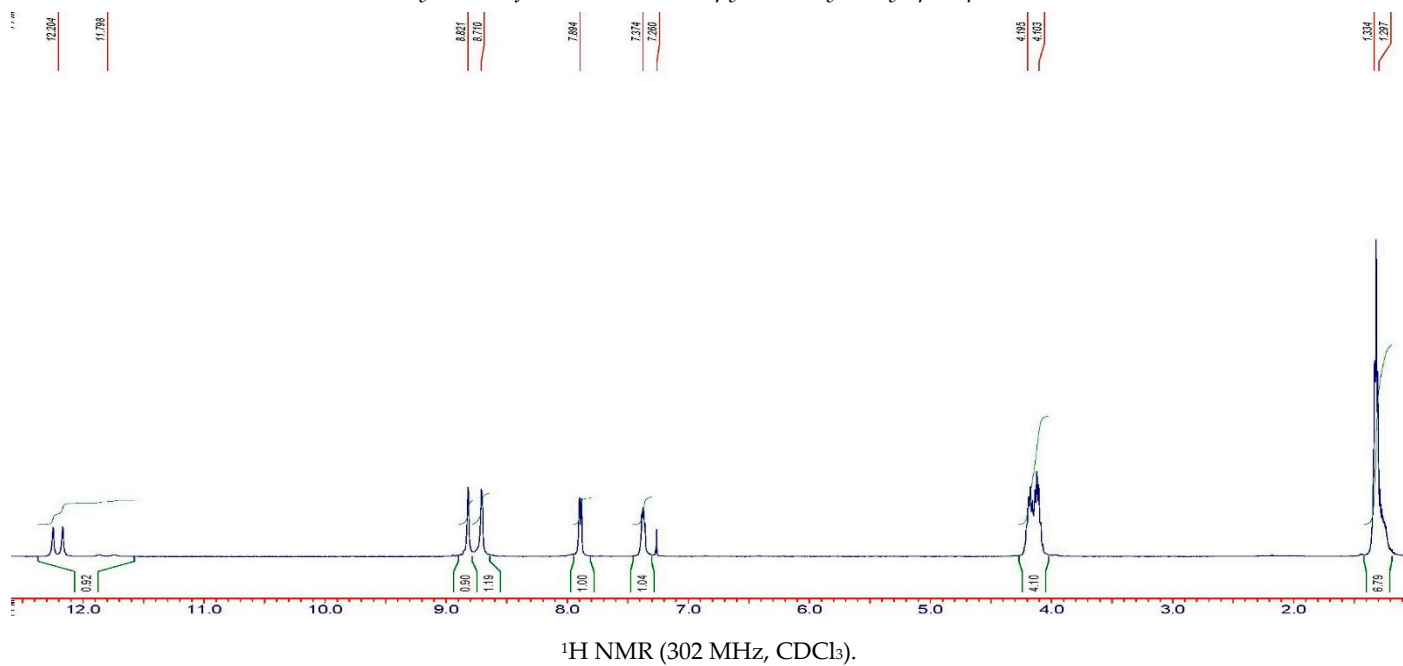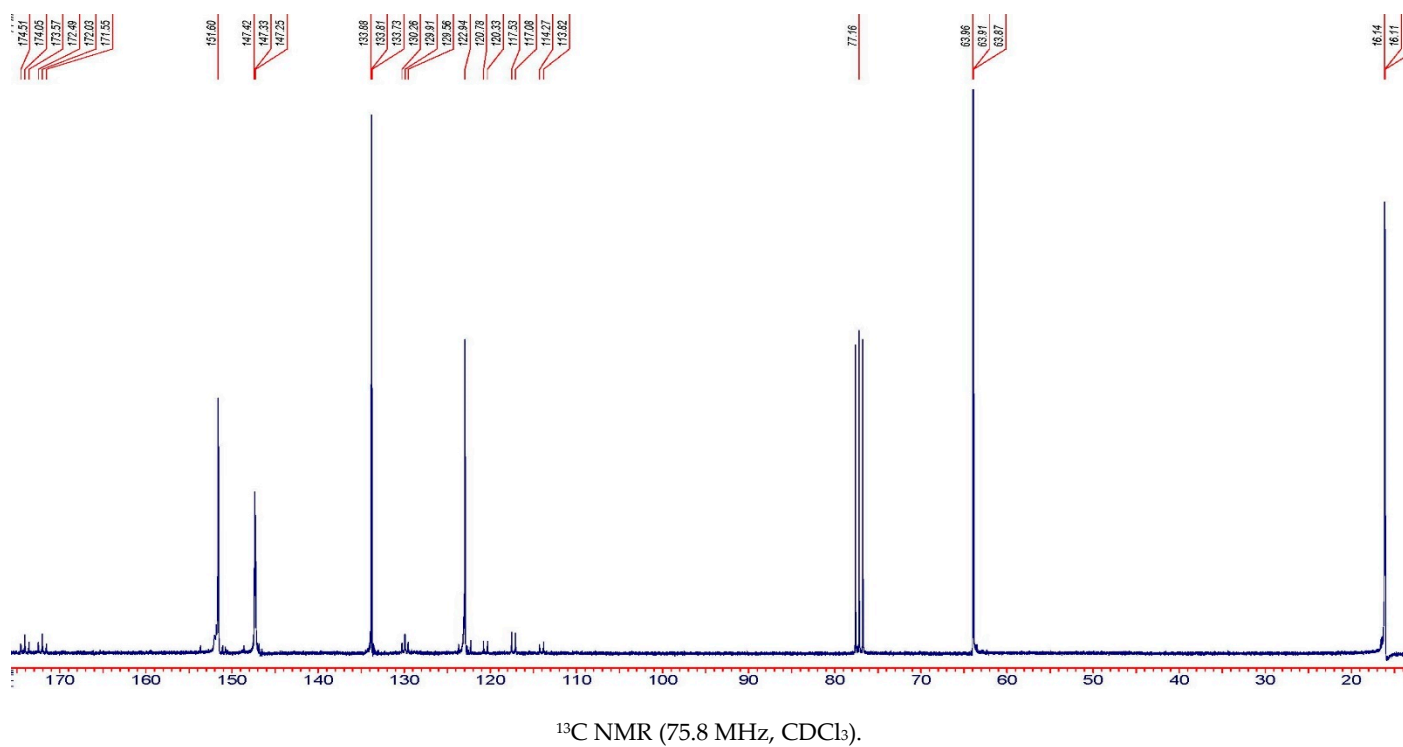

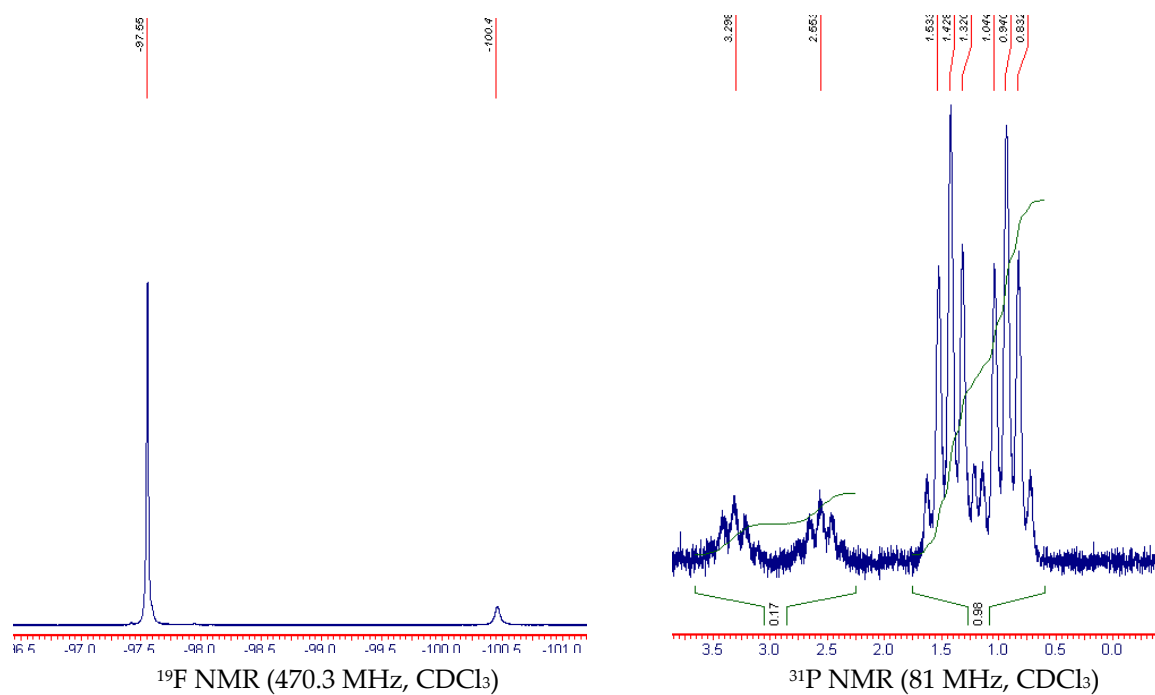

Diethyl (2,2-difluoro-1-imino-2-(pyridin-4-yl)ethyl)phosphonate 2c

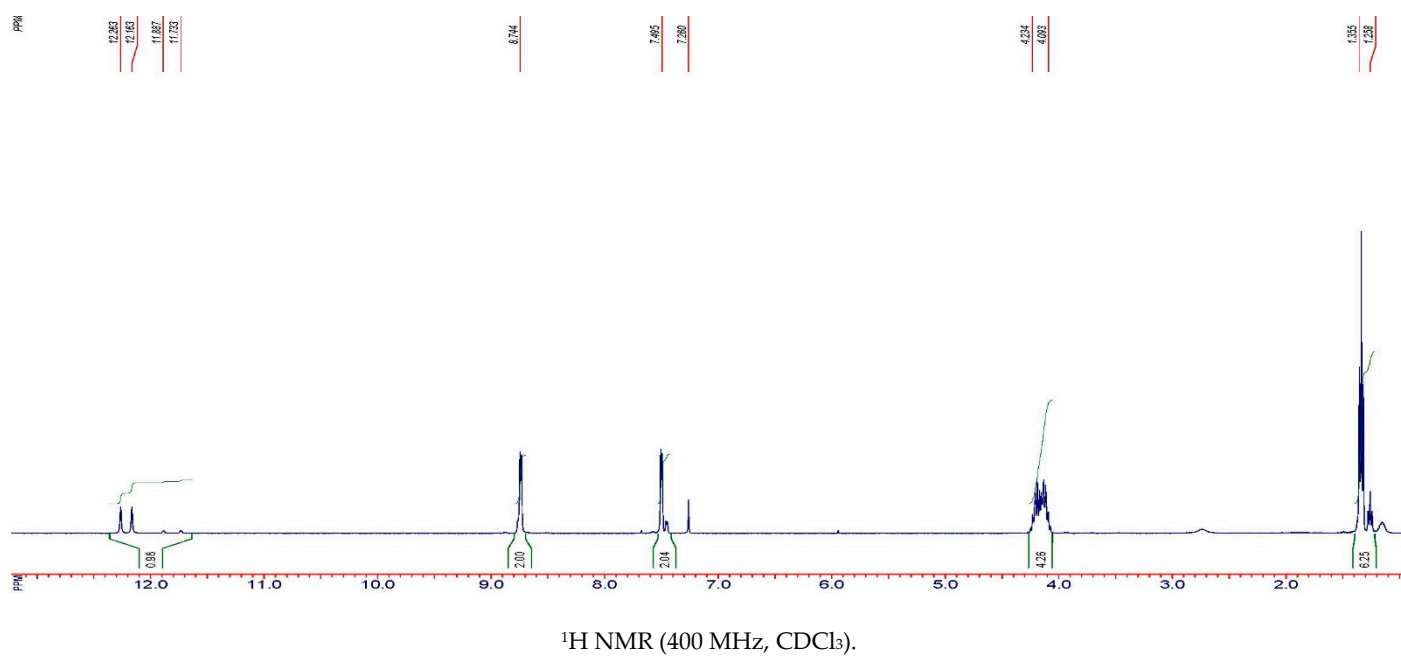



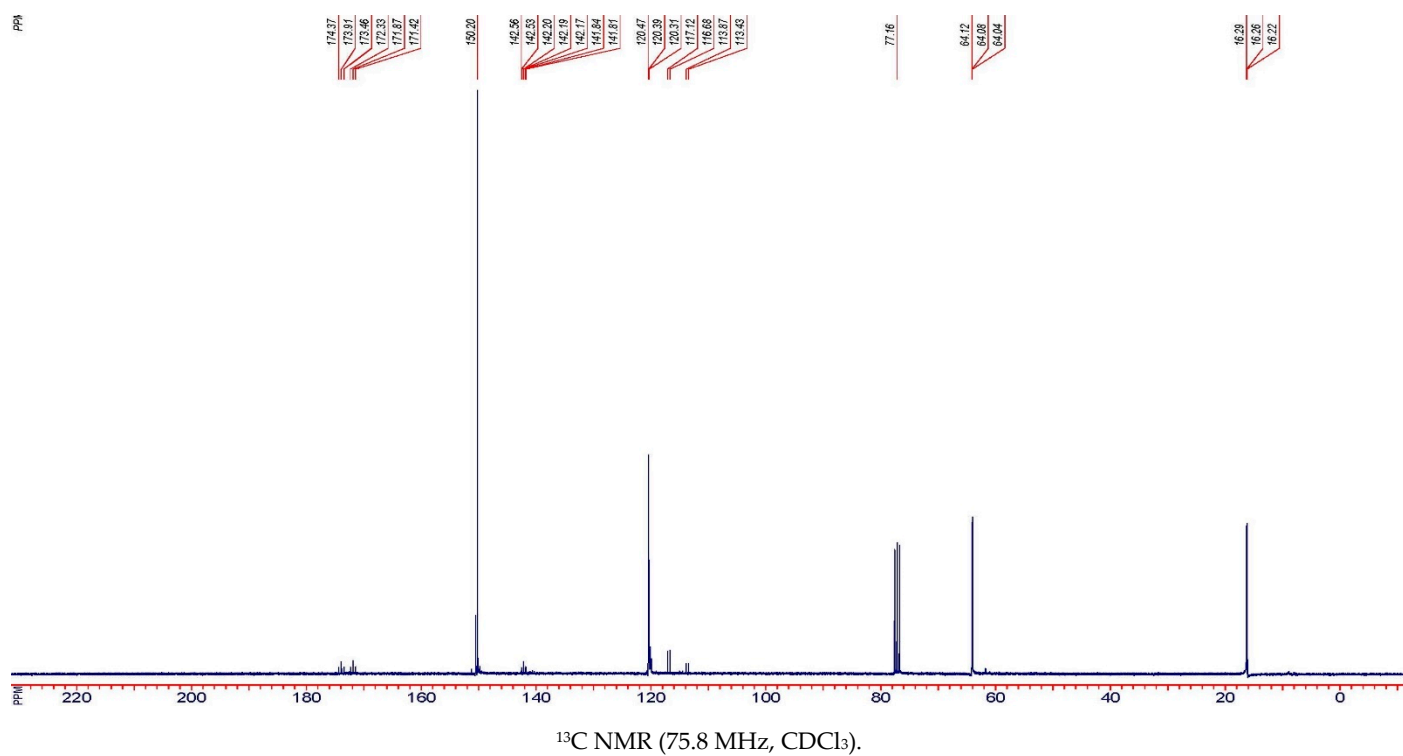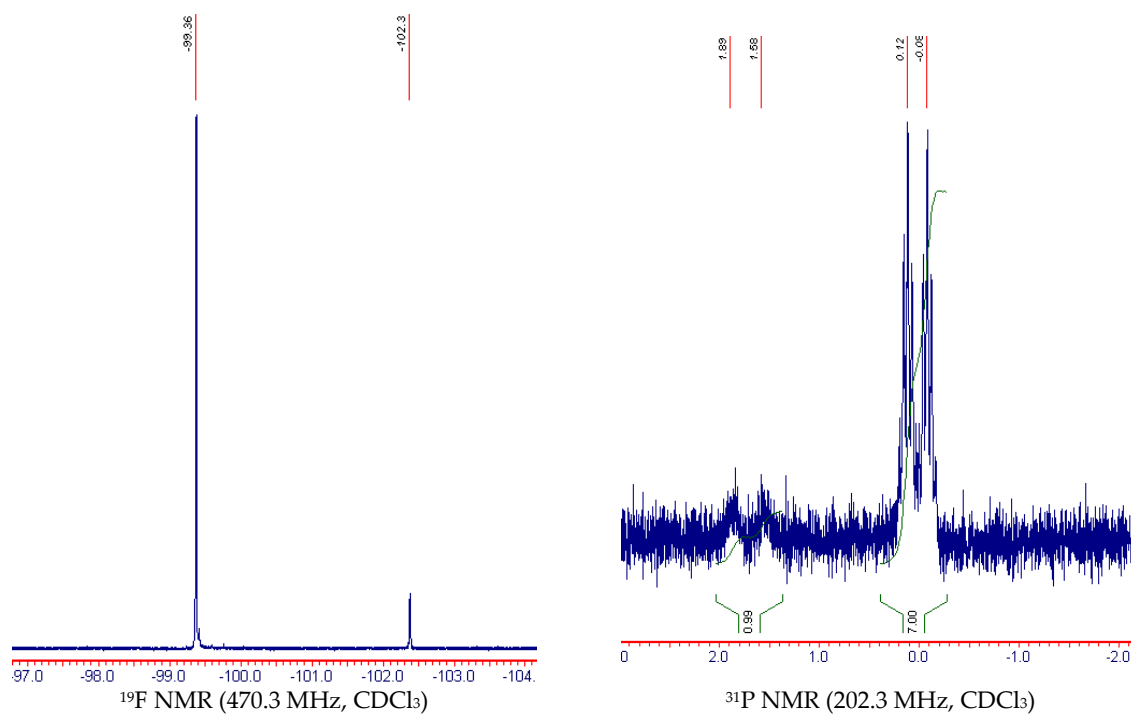

*Diethyl (1-amino-2,2-difluoro-2-(pyridin-2-yl)ethyl)phosphonate 7a*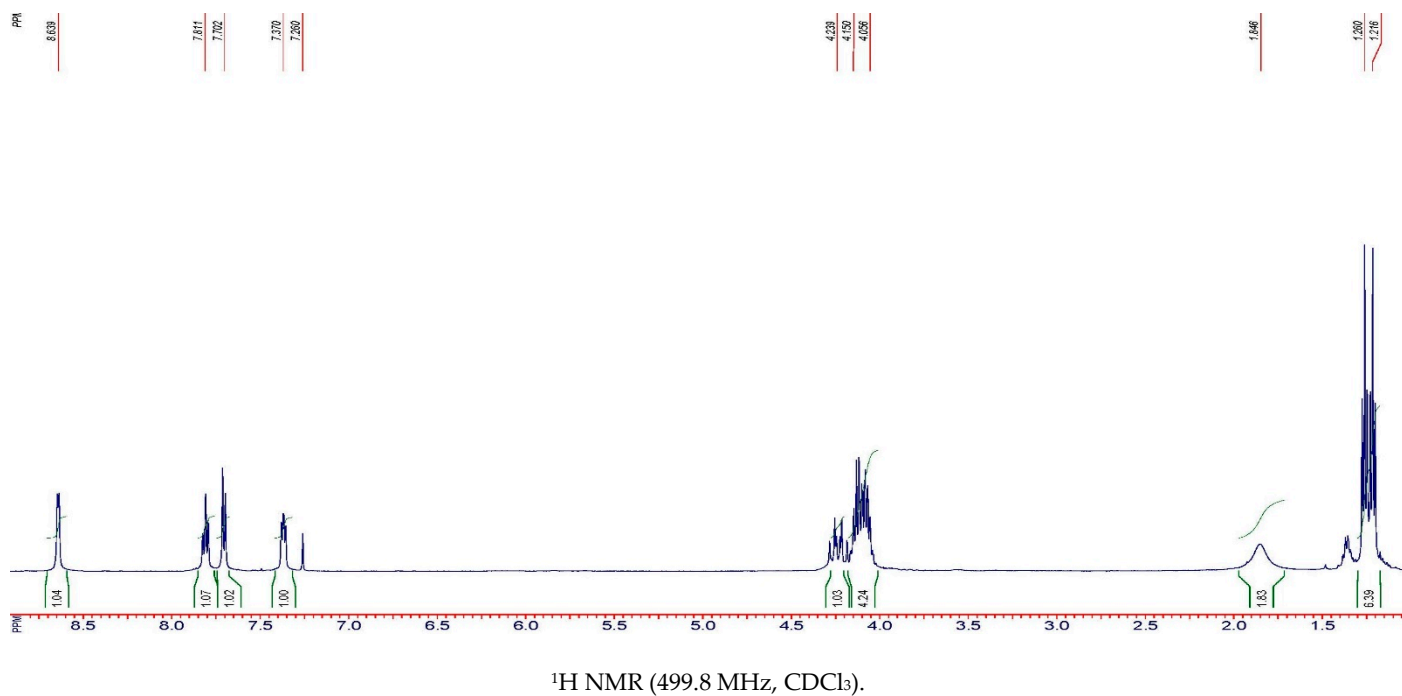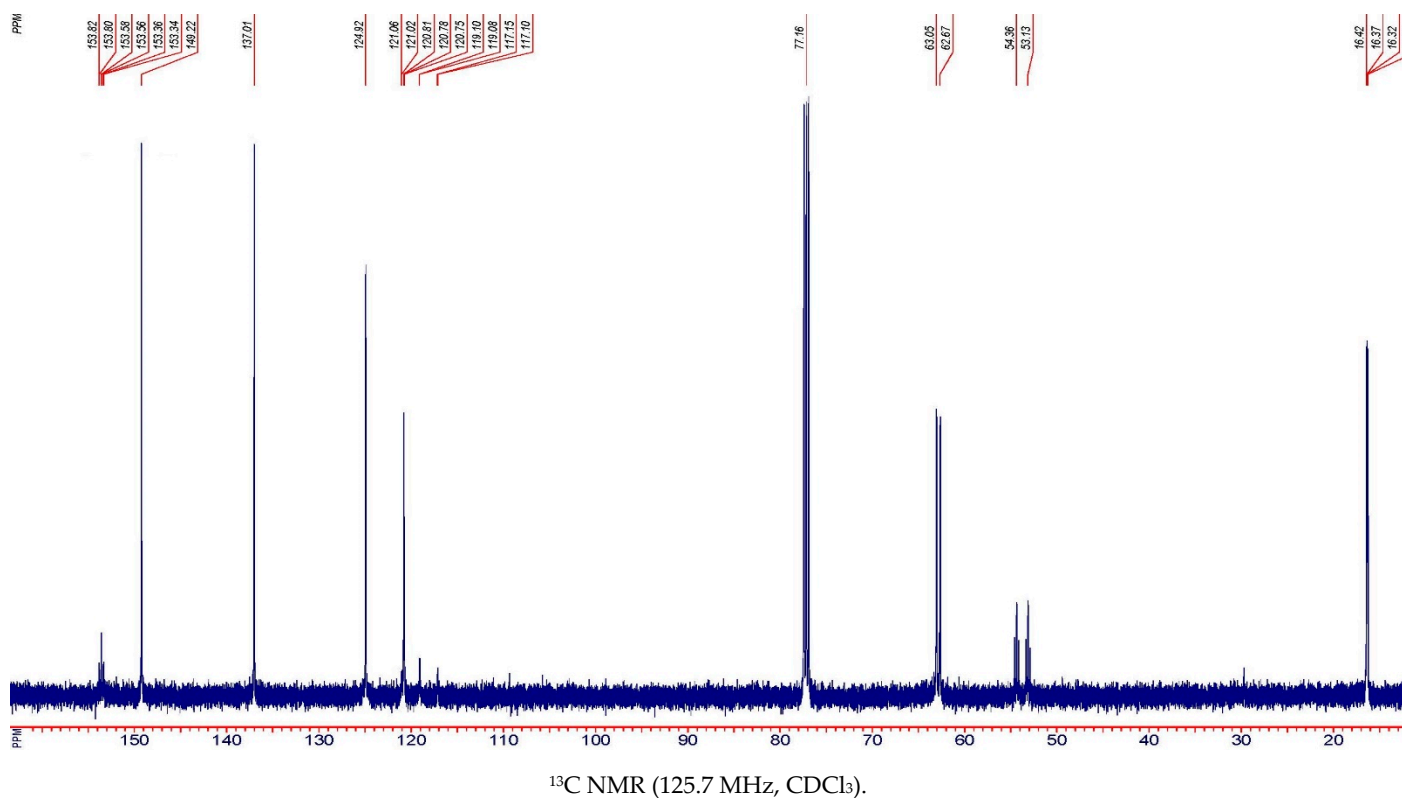

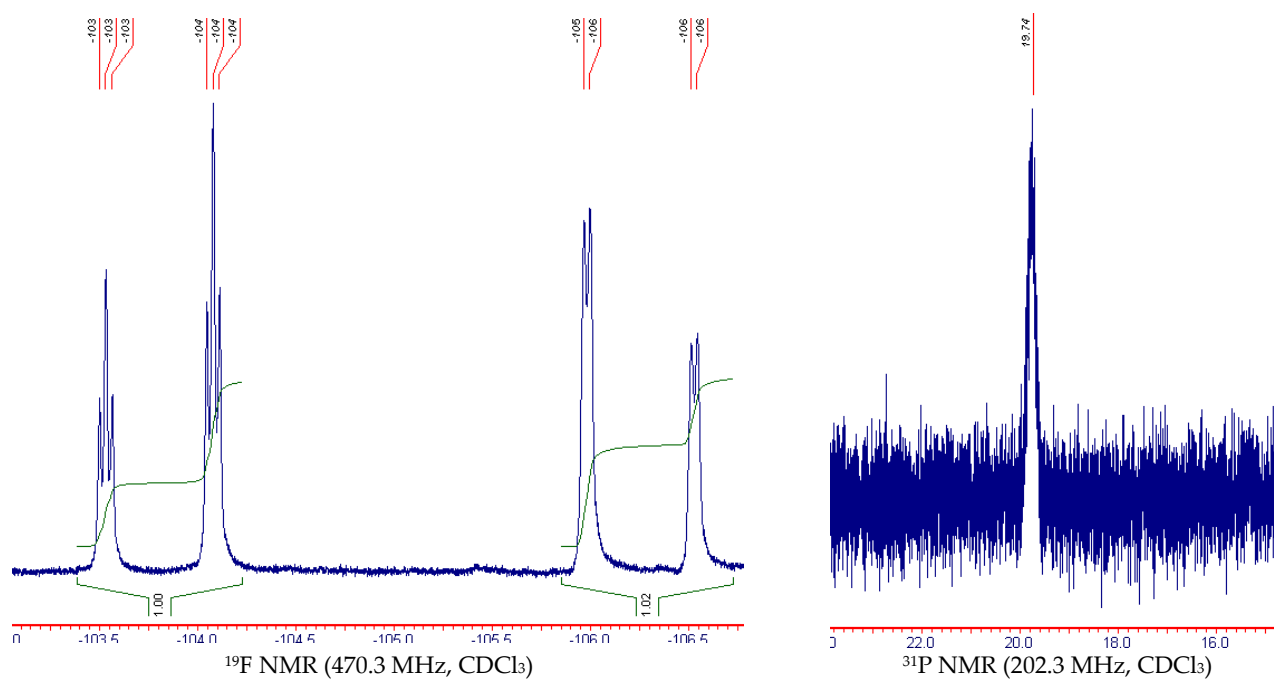

*Diethyl (1-amino-2,2-difluoro-2-(pyridin-3-yl)ethyl)phosphonate 7b*

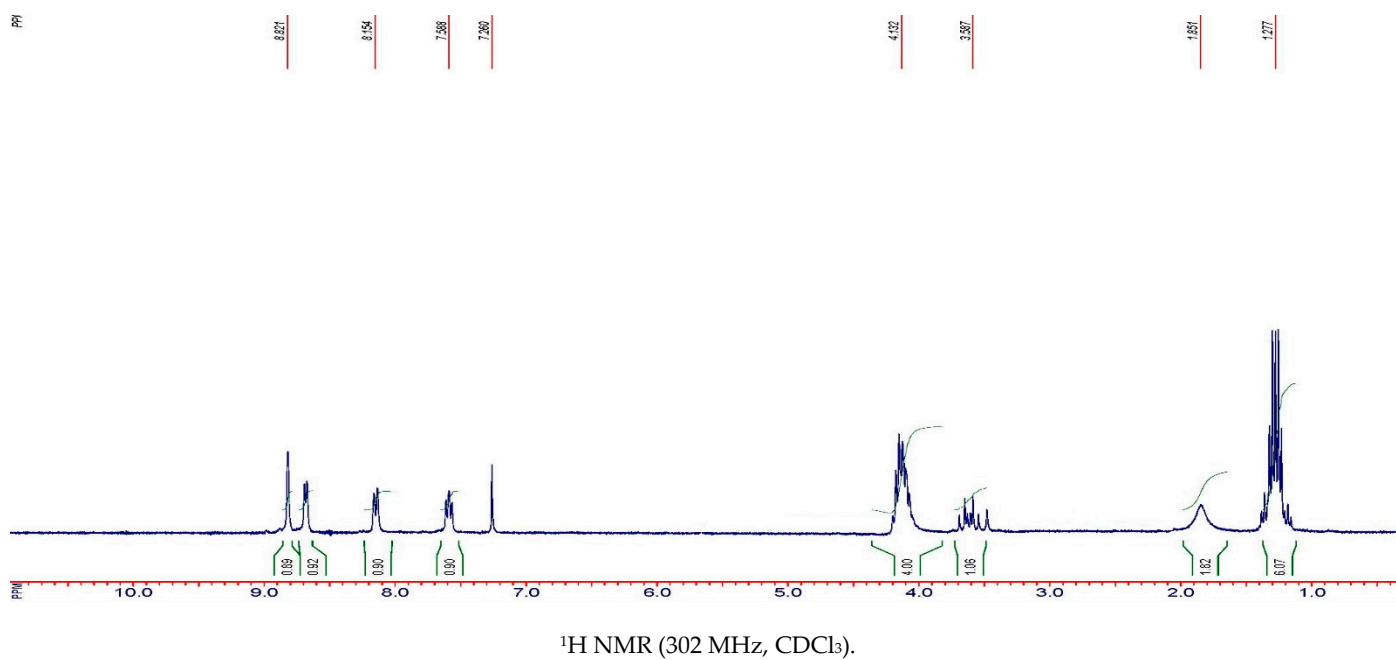

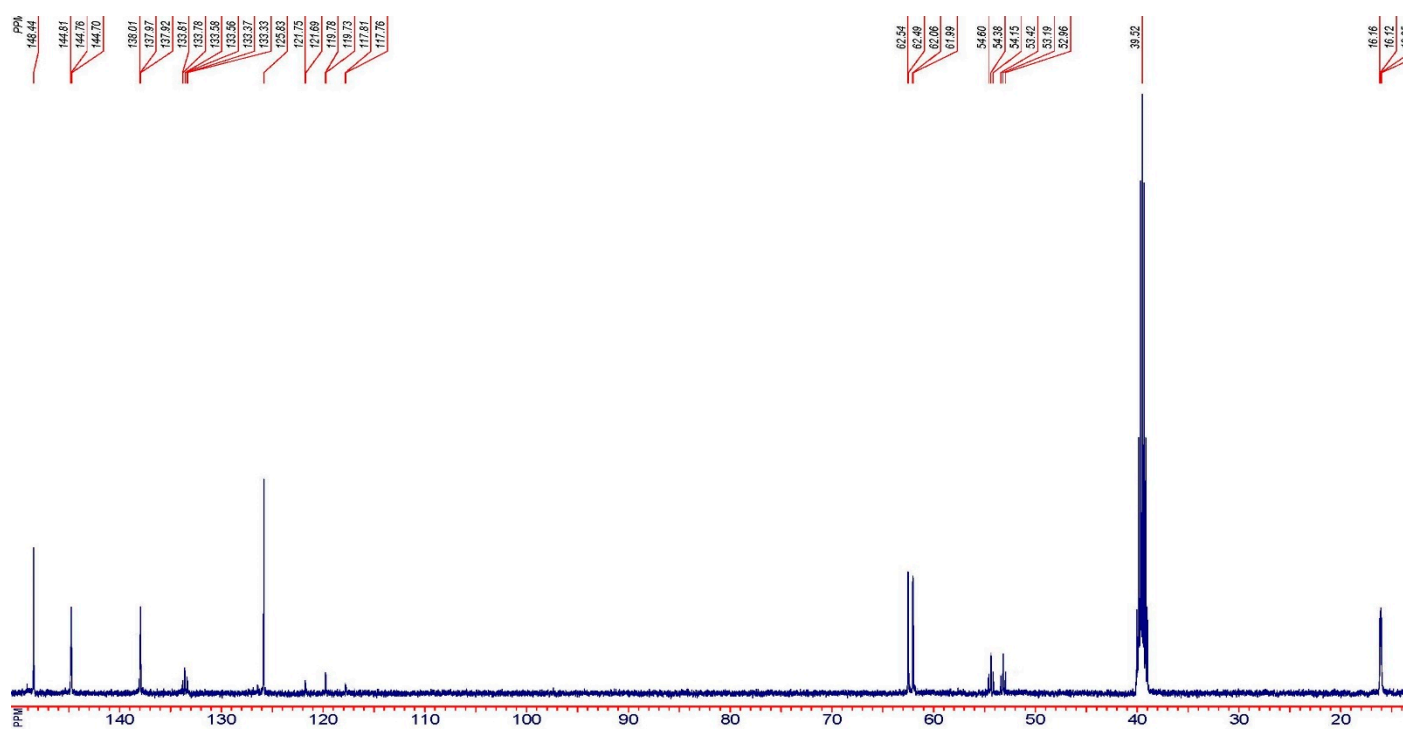

<sup>13</sup>C NMR (125.7 MHz, DMSO-d<sub>6</sub>).

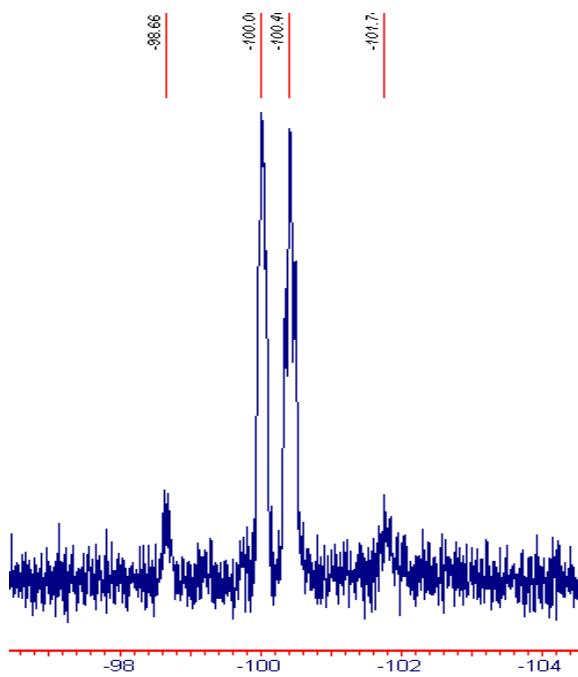

<sup>19</sup>F NMR (470.3 MHz, CDCl<sub>3</sub>)

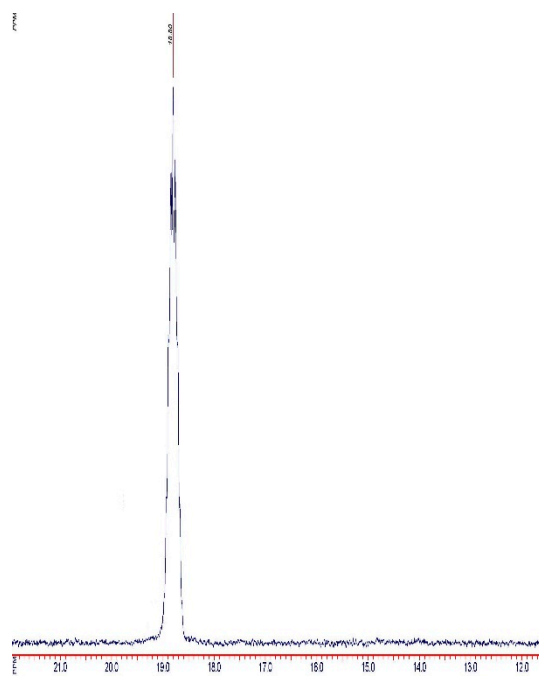

<sup>31</sup>P NMR (202.3 MHz, CDCl<sub>3</sub>)

*Diethyl (1-amino-2,2-difluoro-2-(pyridin-4-yl)ethyl)phosphonate 7c*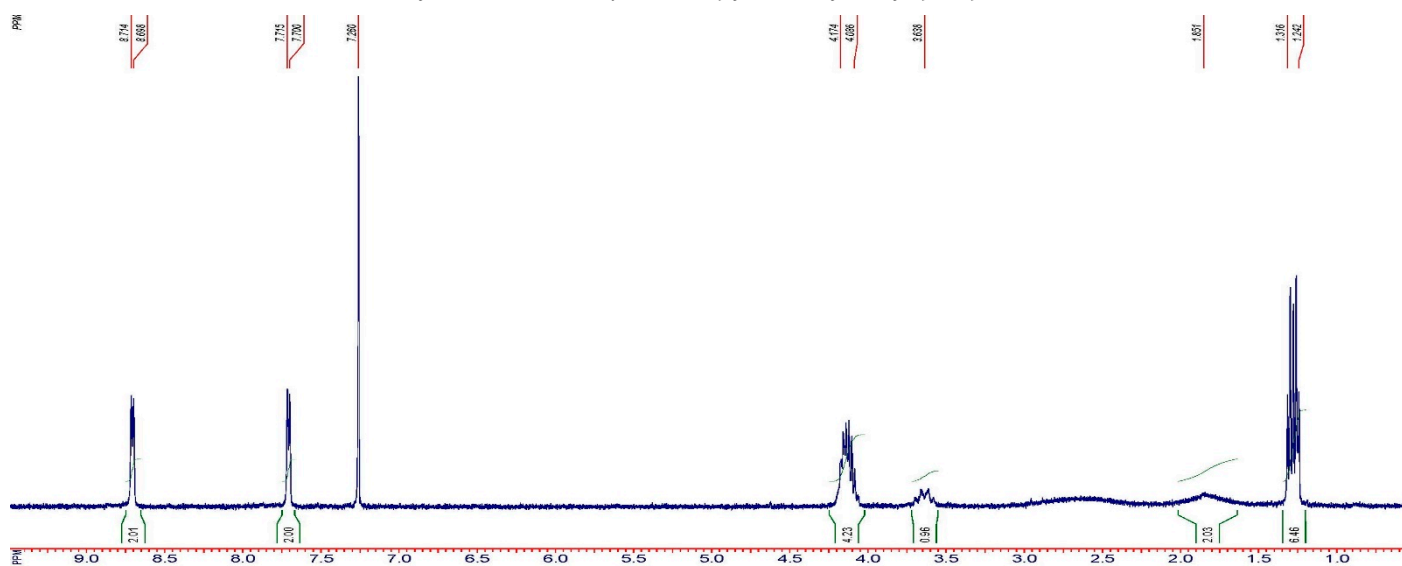

<sup>1</sup>H NMR (302 MHz, CDCl<sub>3</sub>).

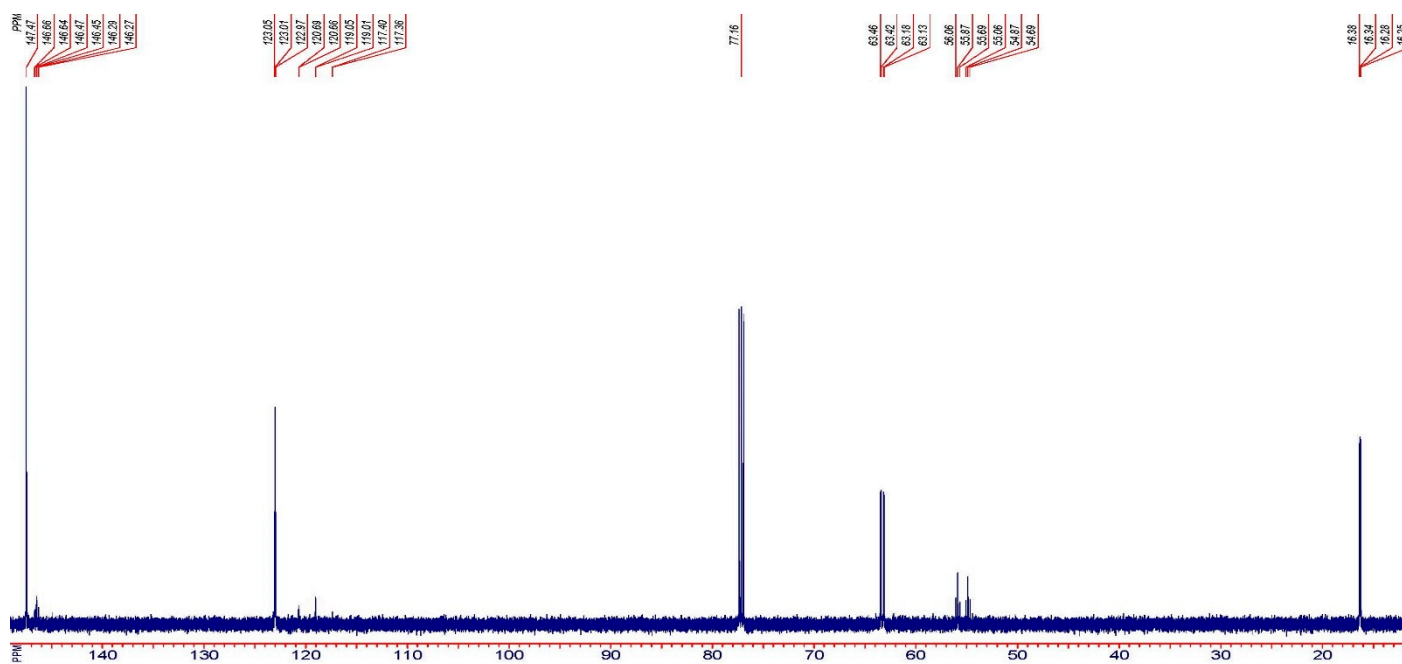

<sup>13</sup>C NMR (150.8 MHz, CDCl<sub>3</sub>).

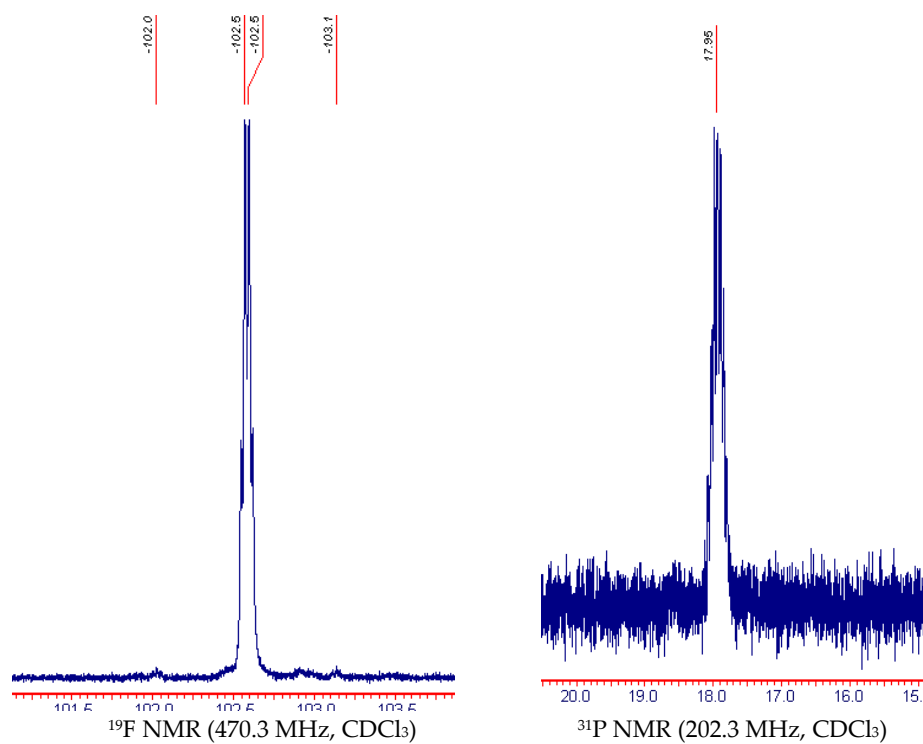

1. -Amino-2,2-difluoro-2-(pyridin-2-yl)ethyl)phosphonic acid **8a**

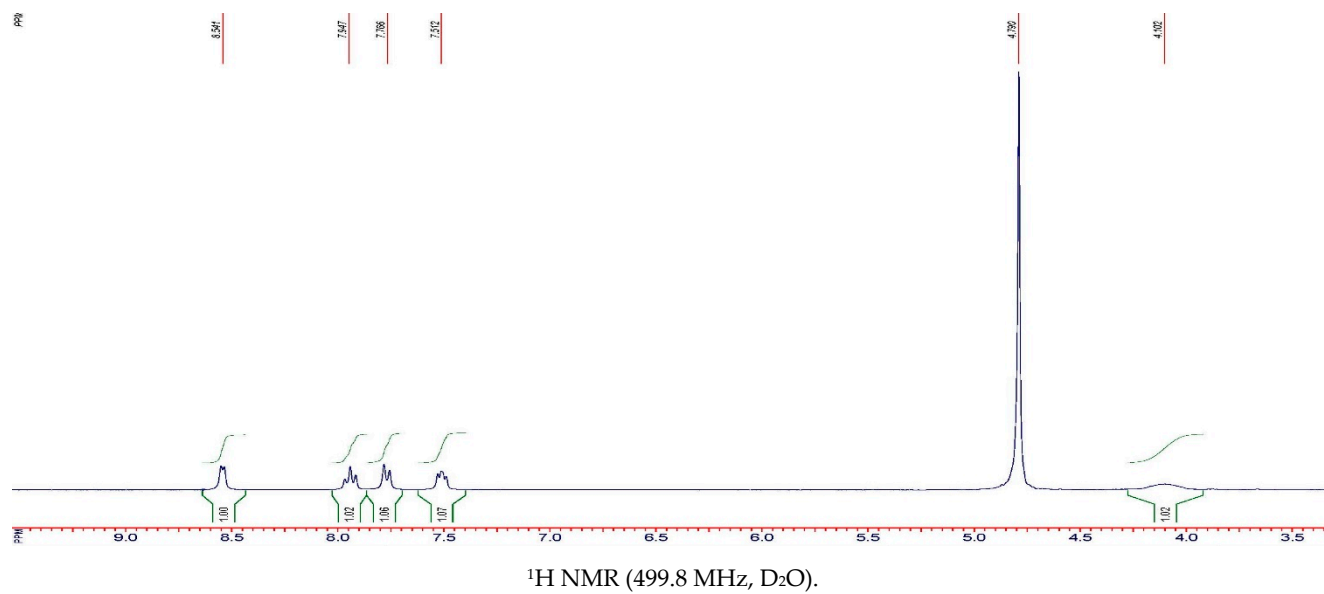

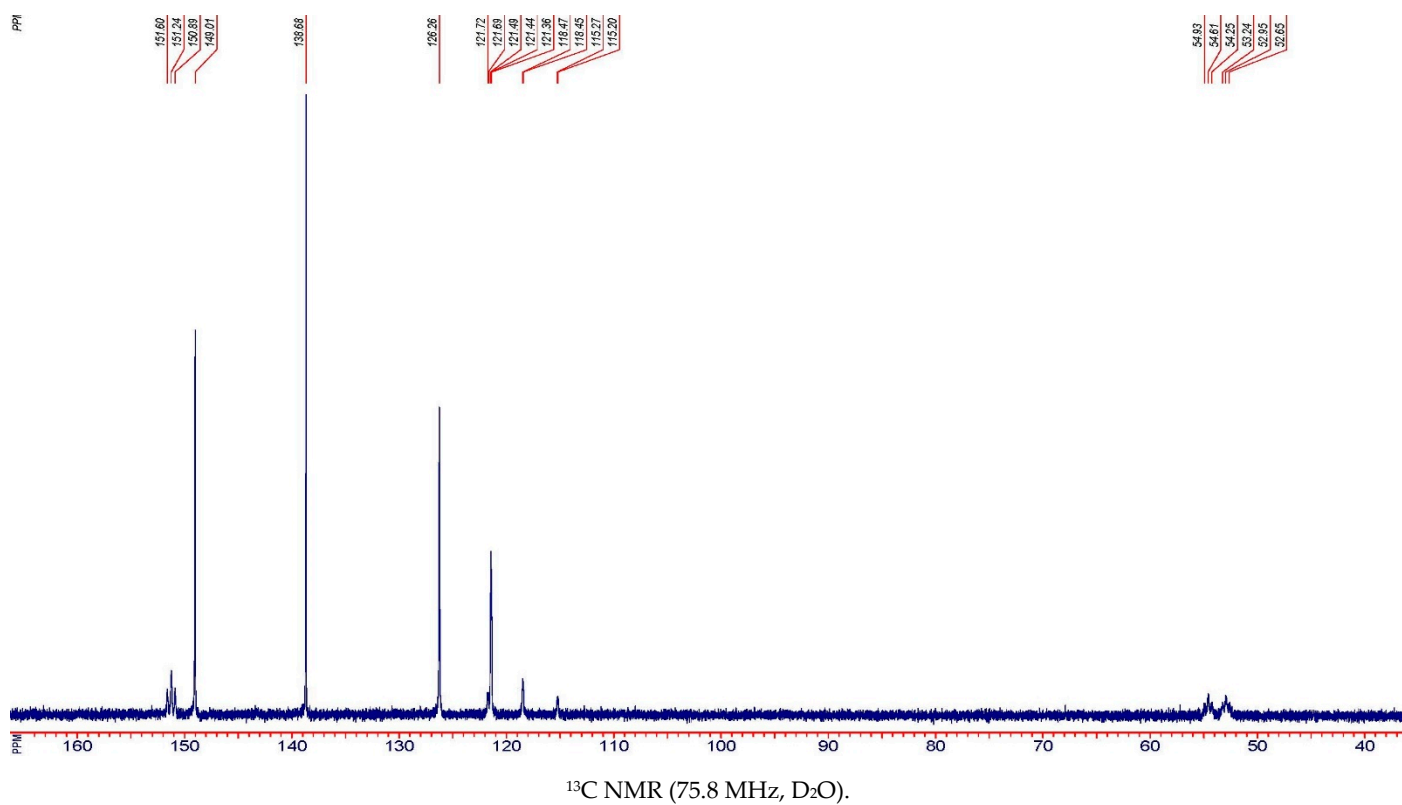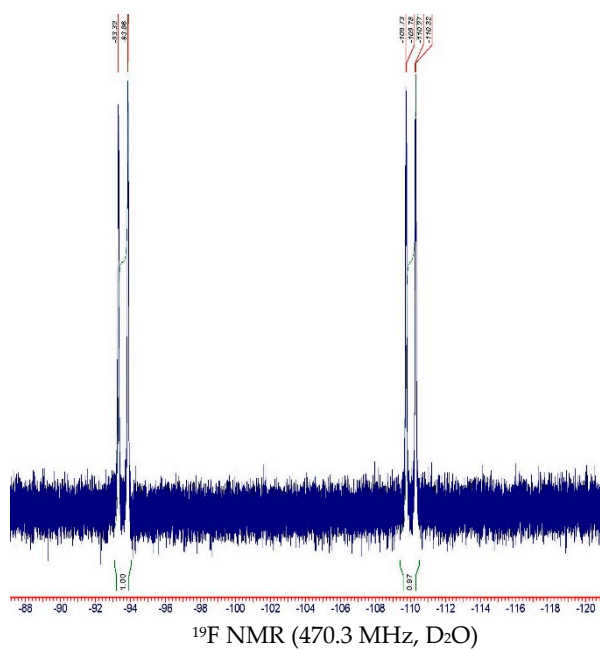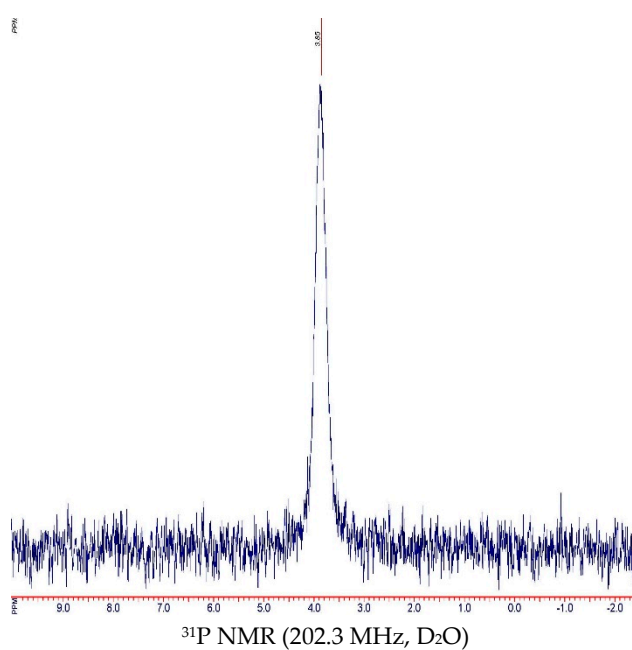

*(1-Amino-2,2-difluoro-2-(pyridin-3-yl)ethyl)phosphonic acid 8b*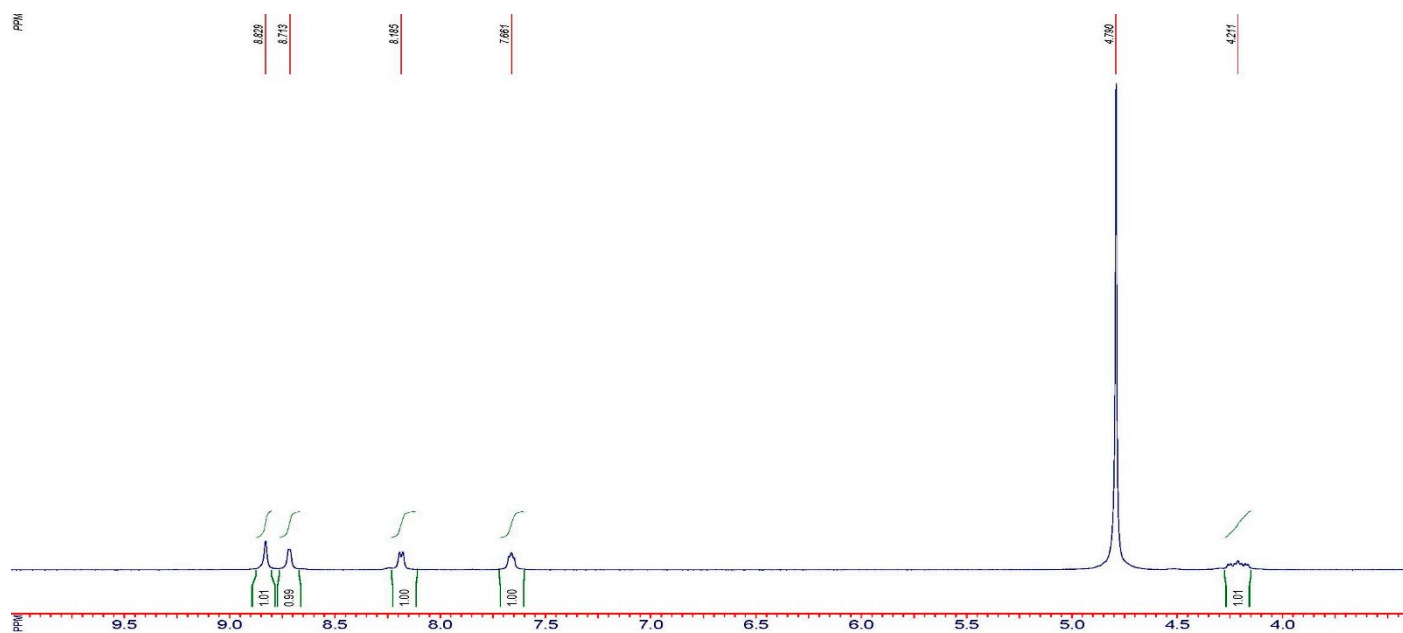<sup>1</sup>H NMR (499.8 MHz, D<sub>2</sub>O).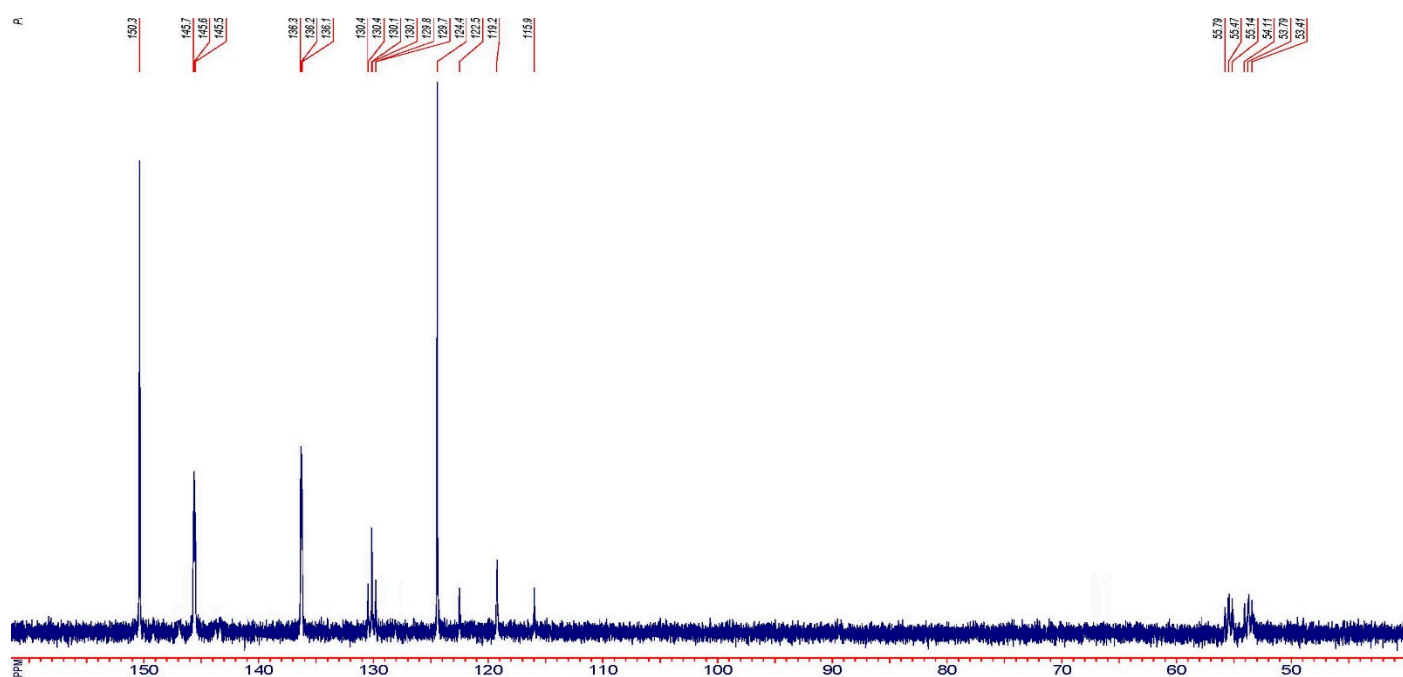<sup>13</sup>C NMR (75.8 MHz, D<sub>2</sub>O).



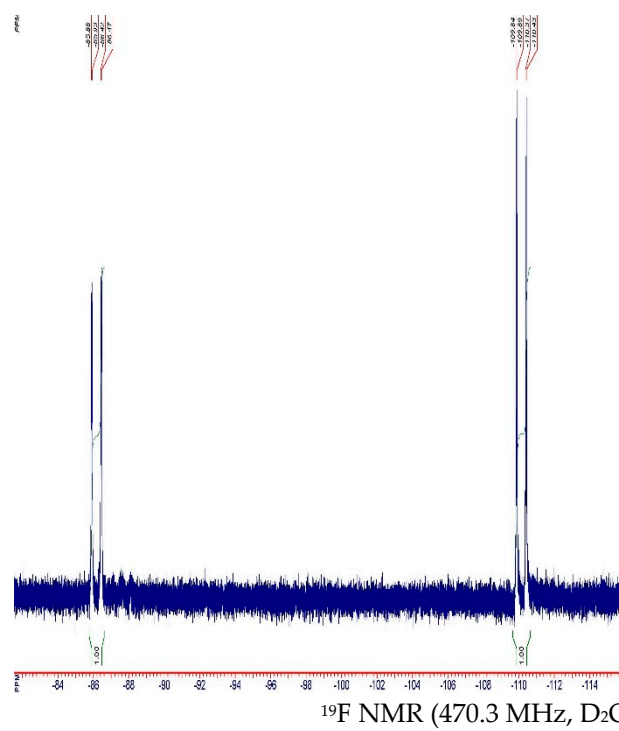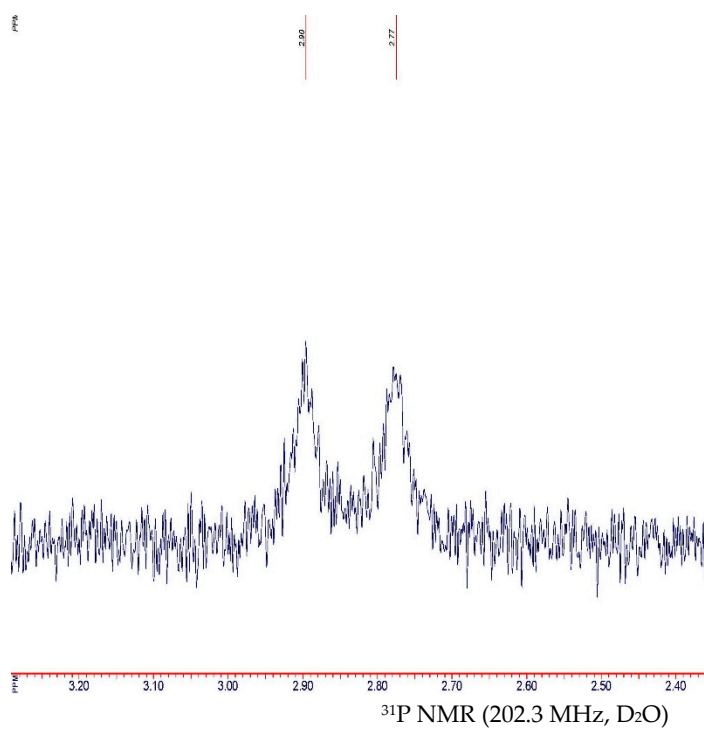

(1-Amino-2,2-difluoro-2-(pyridin-4-yl)ethyl)phosphonic acid **8c**

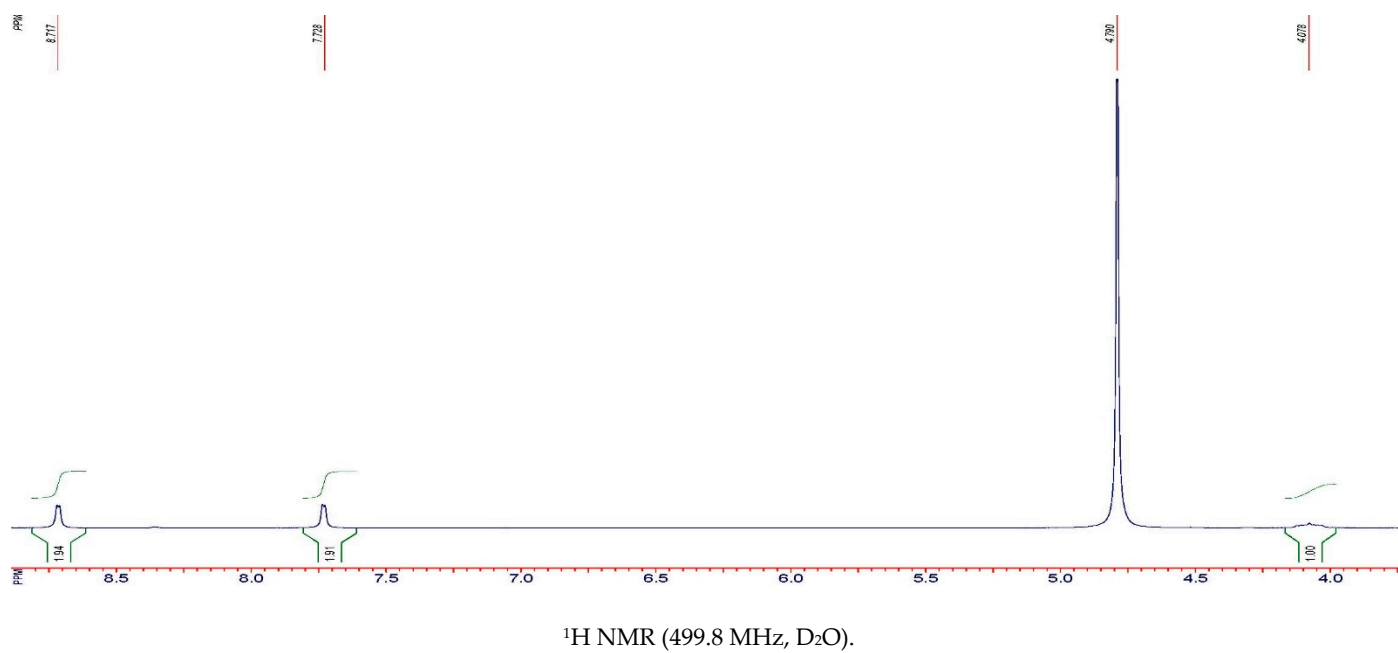

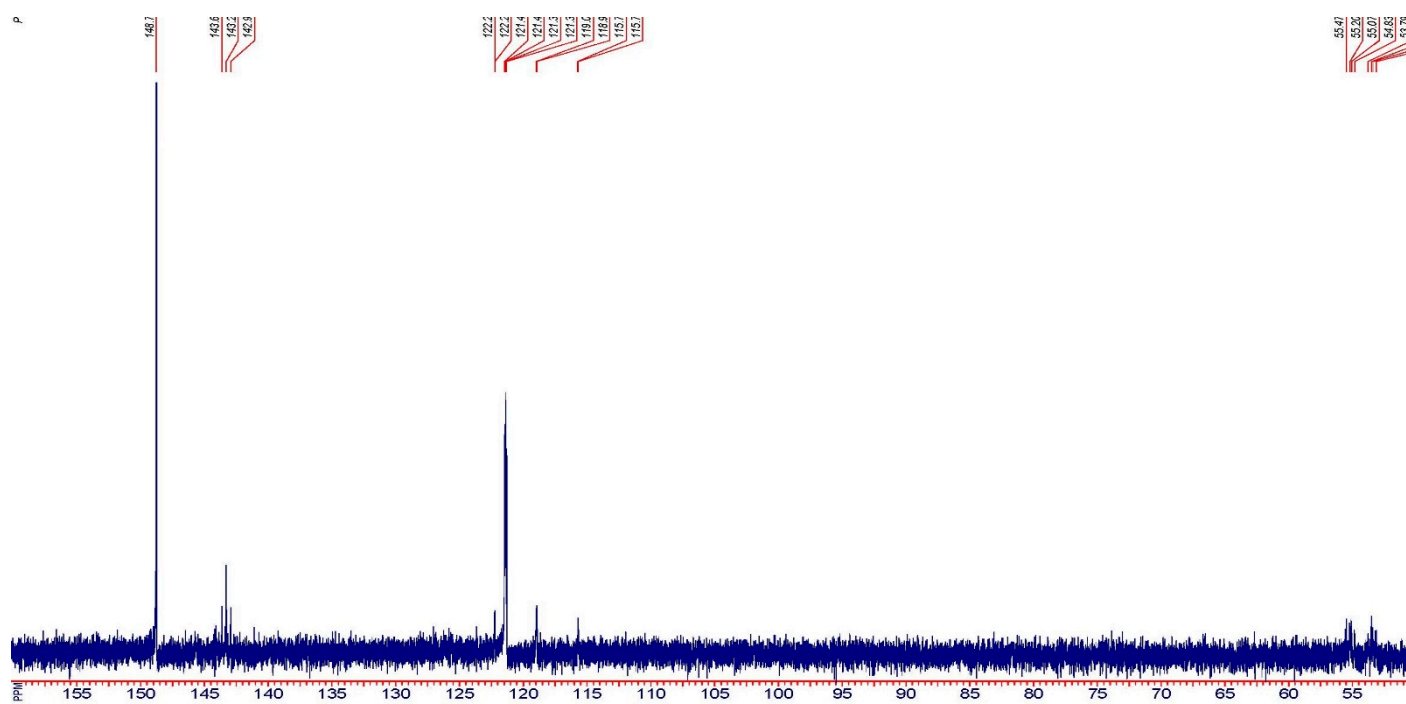

<sup>13</sup>C NMR (75.8 MHz, D<sub>2</sub>O).

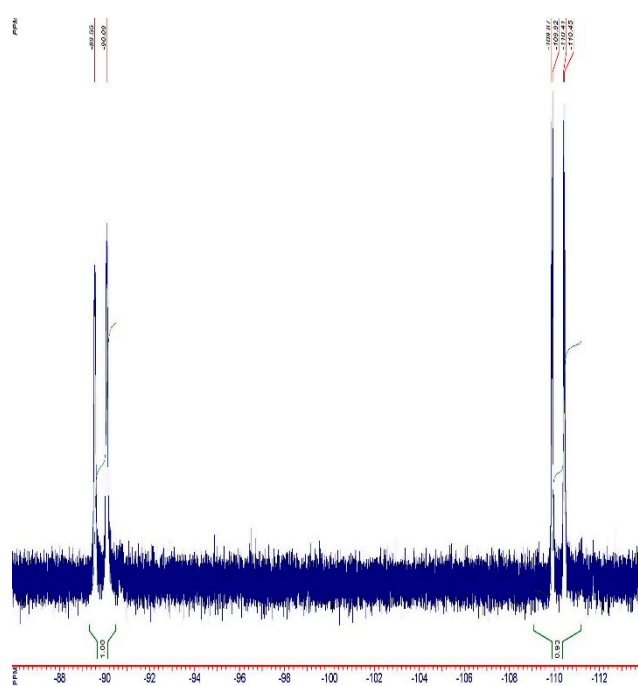

<sup>19</sup>F NMR (470.3 MHz, D<sub>2</sub>O)

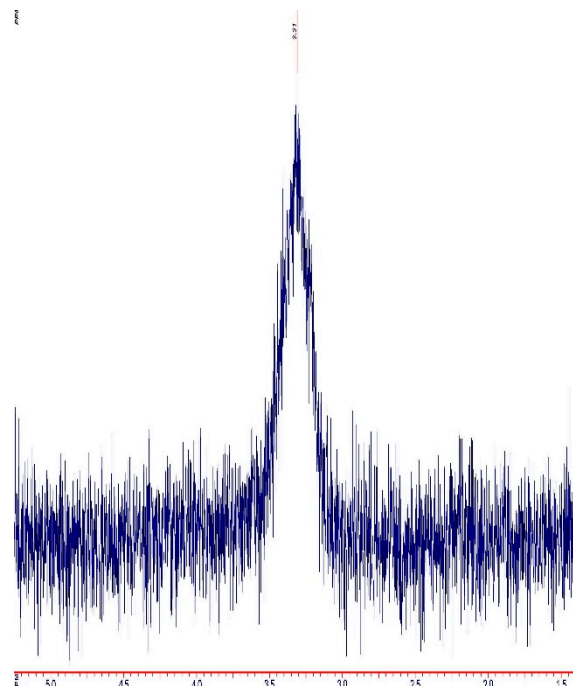

<sup>31</sup>P NMR (202.3 MHz, D<sub>2</sub>O)

*Diethyl (1-amino-2,2-difluoro-2-(piperidin-4-yl)ethyl)phosphonate 9*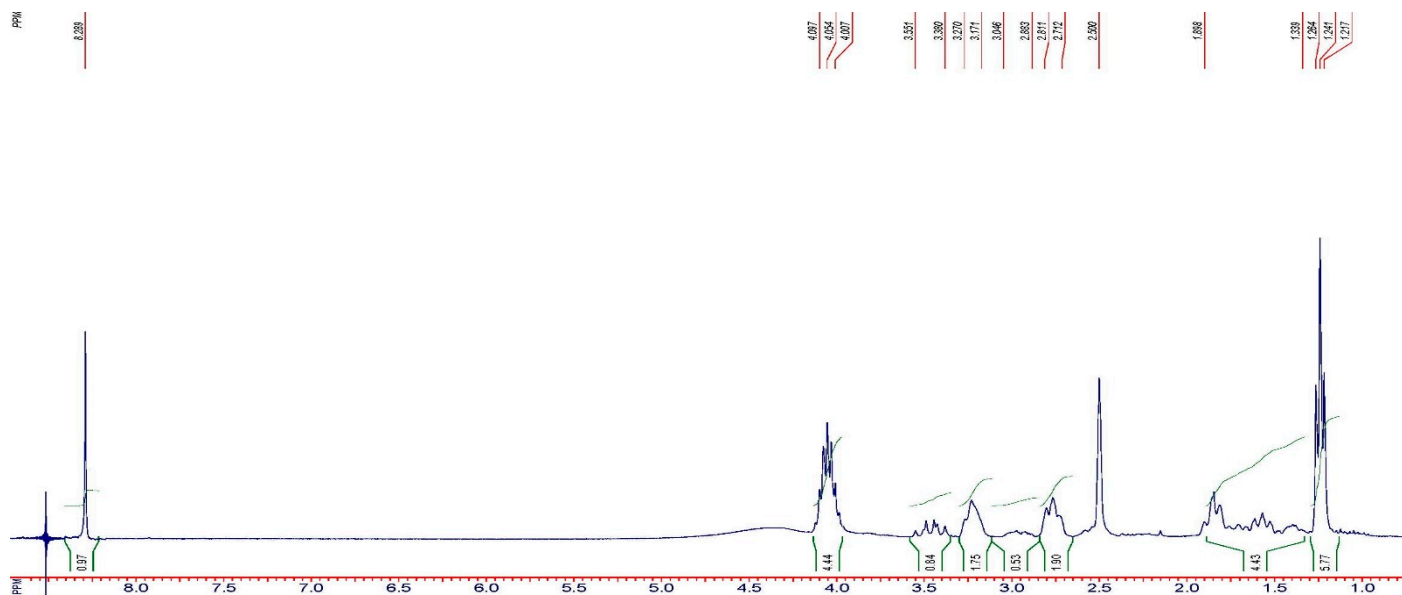<sup>1</sup>H NMR (302 MHz, DMSO-d<sub>6</sub>).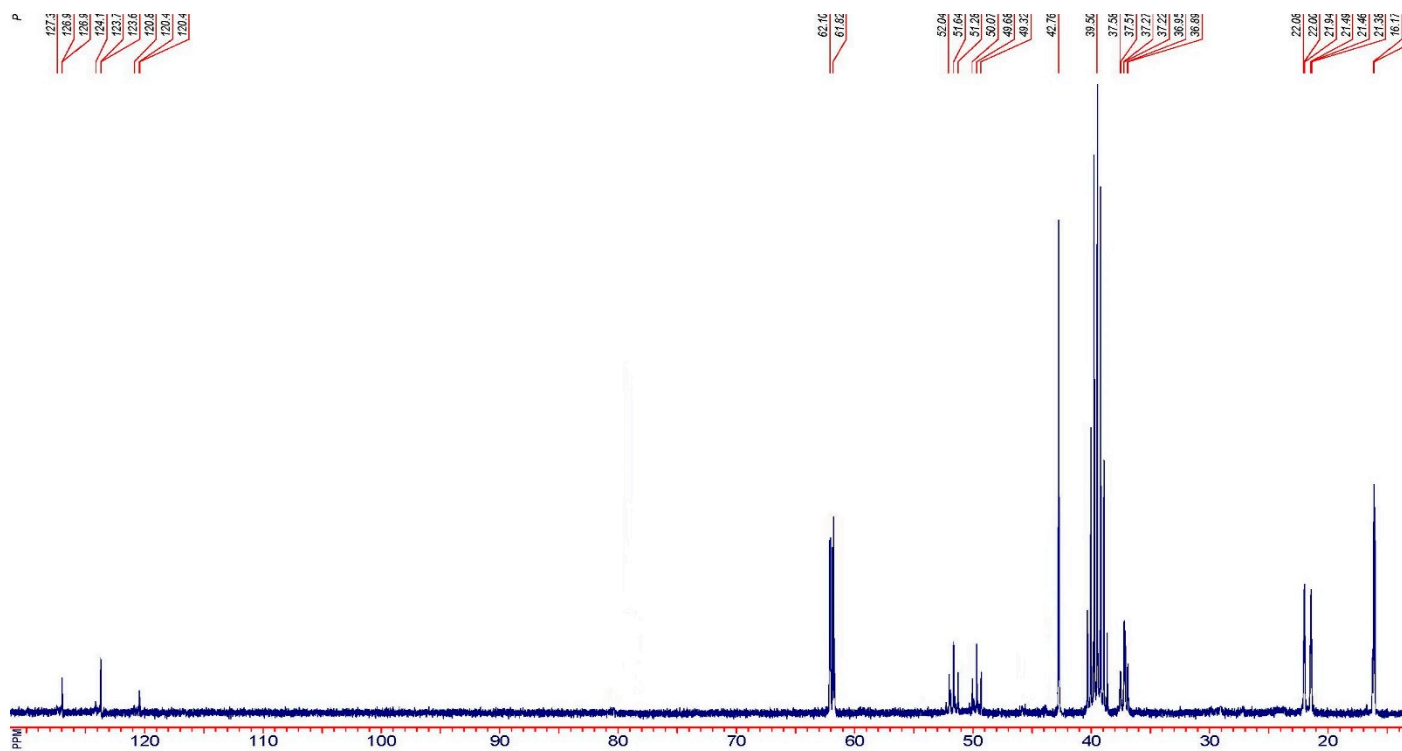<sup>13</sup>C NMR (75.8 MHz, DMSO-d<sub>6</sub>).

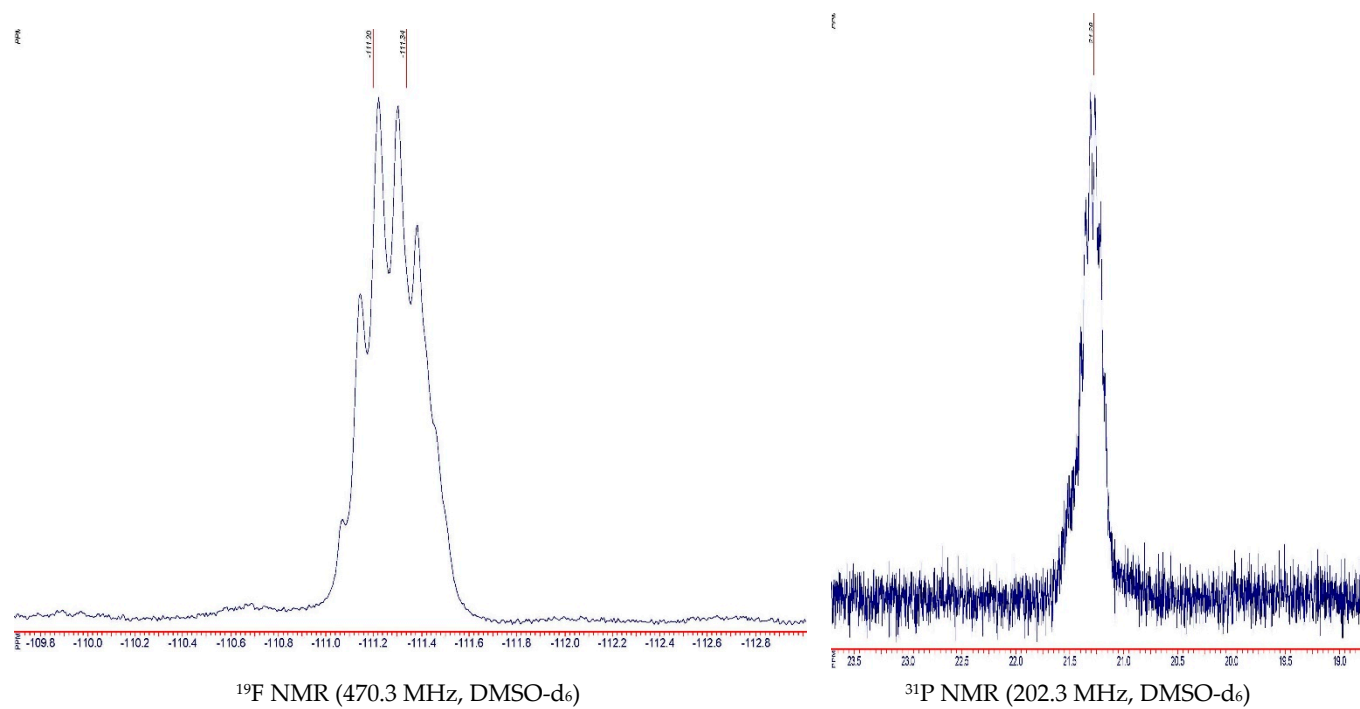

(1-Amino-2,2-difluoro-2-(piperidin-4-yl)ethyl)phosphonic acid **10**

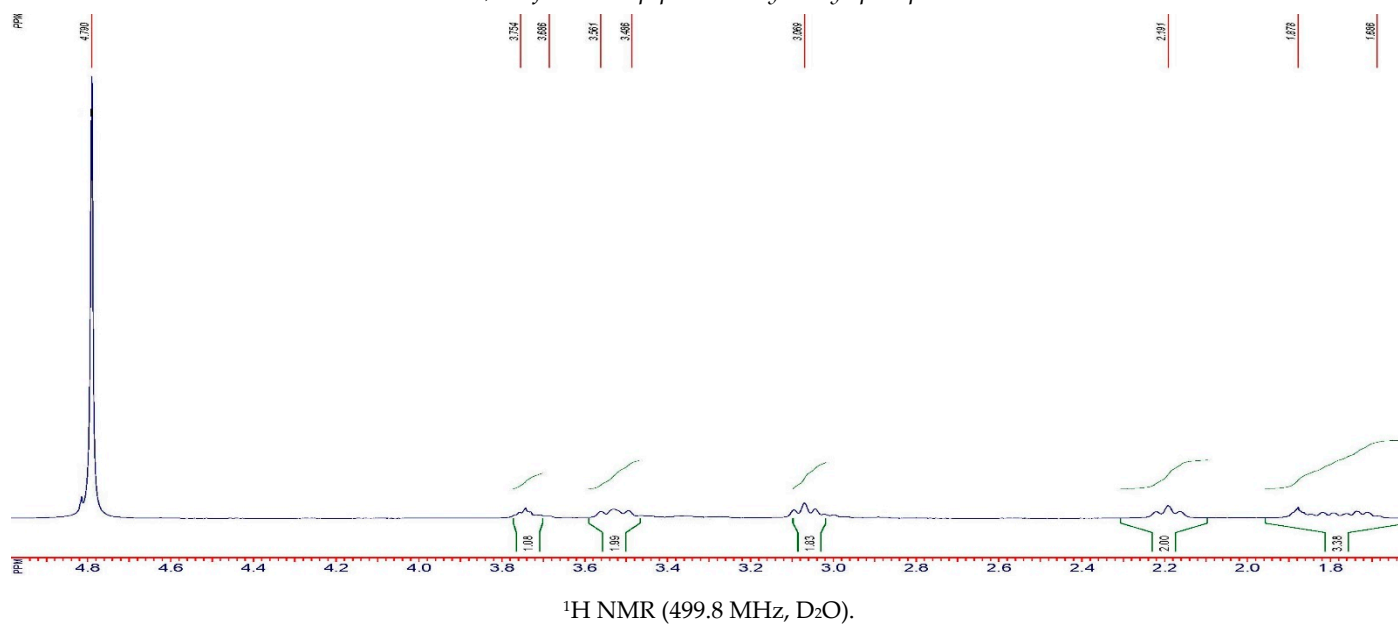

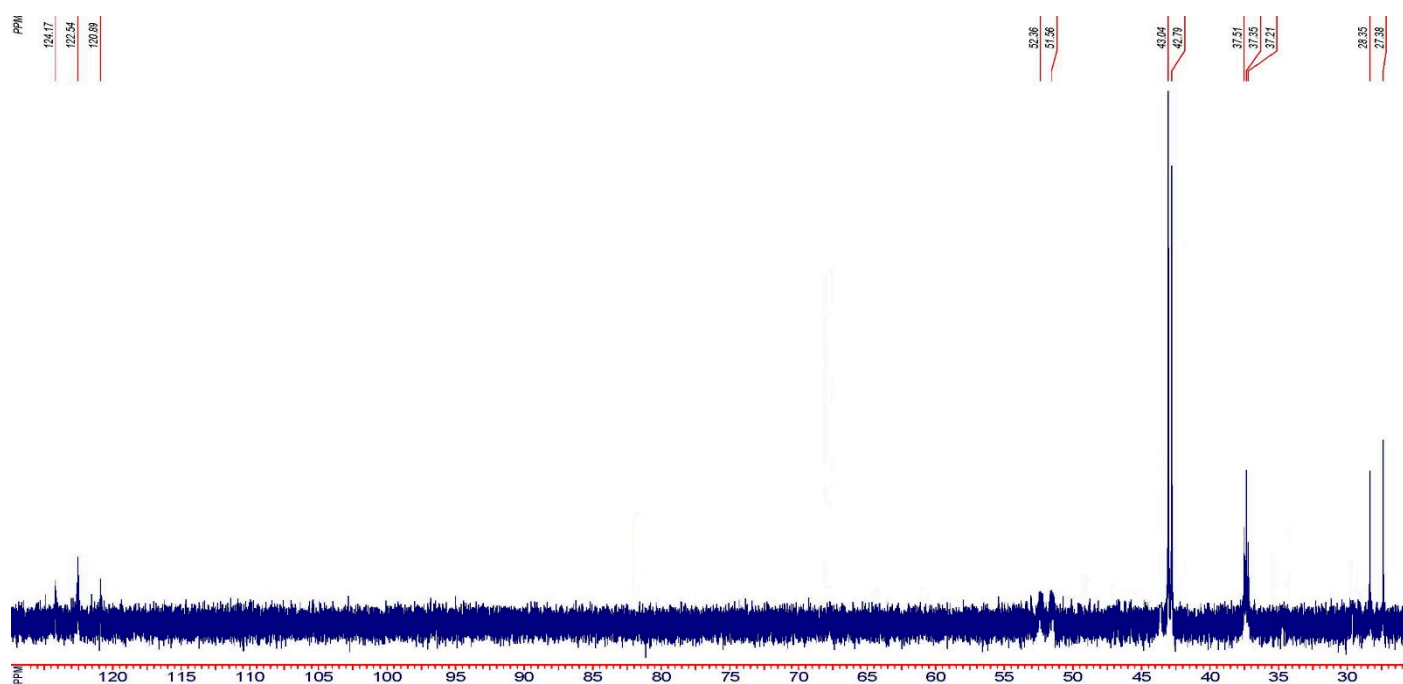

<sup>13</sup>C NMR (150.8 MHz, D<sub>2</sub>O).

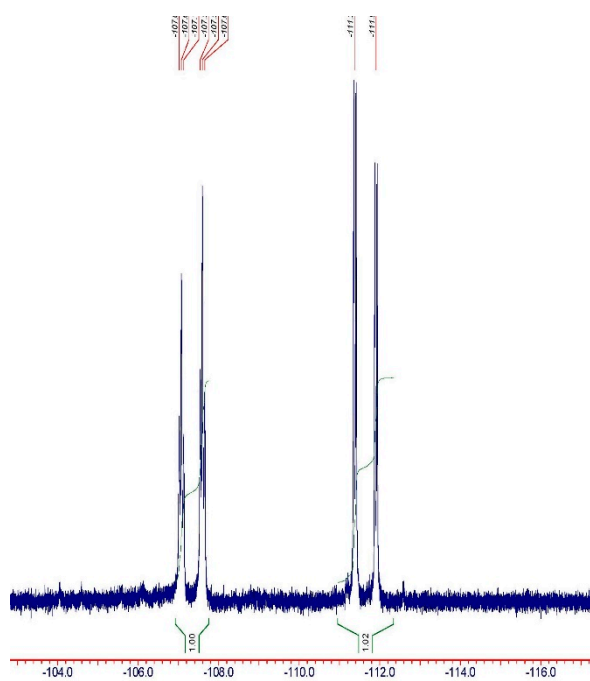

<sup>19</sup>F NMR (470.3 MHz, D<sub>2</sub>O)

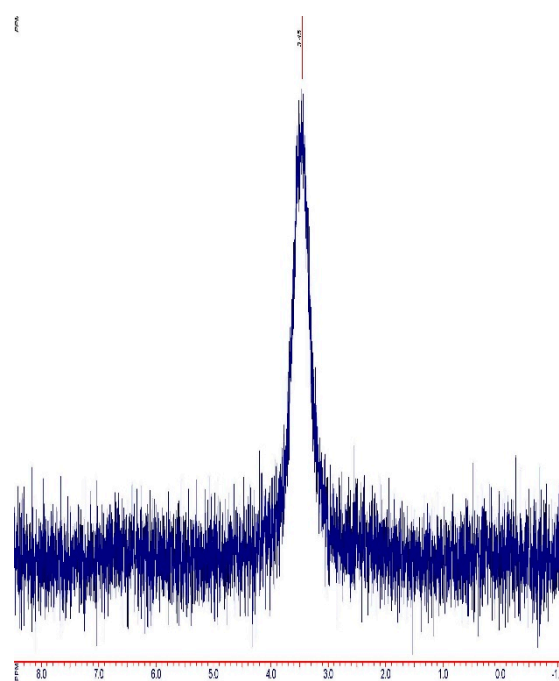

<sup>31</sup>P NMR (202.3 MHz, D<sub>2</sub>O)

*Diethyl (2-(difluoro(pyridin-2-yl)methyl)-4-oxothiazolidin-2-yl)phosphonate 11a*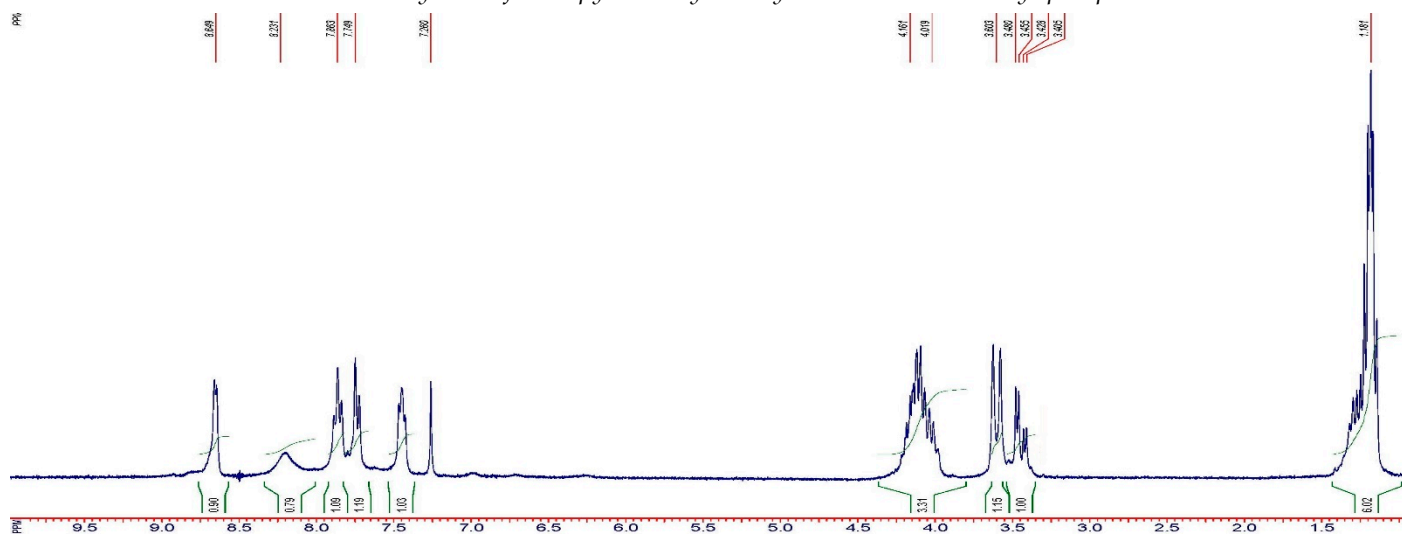<sup>1</sup>H NMR (302 MHz, CDCl<sub>3</sub>).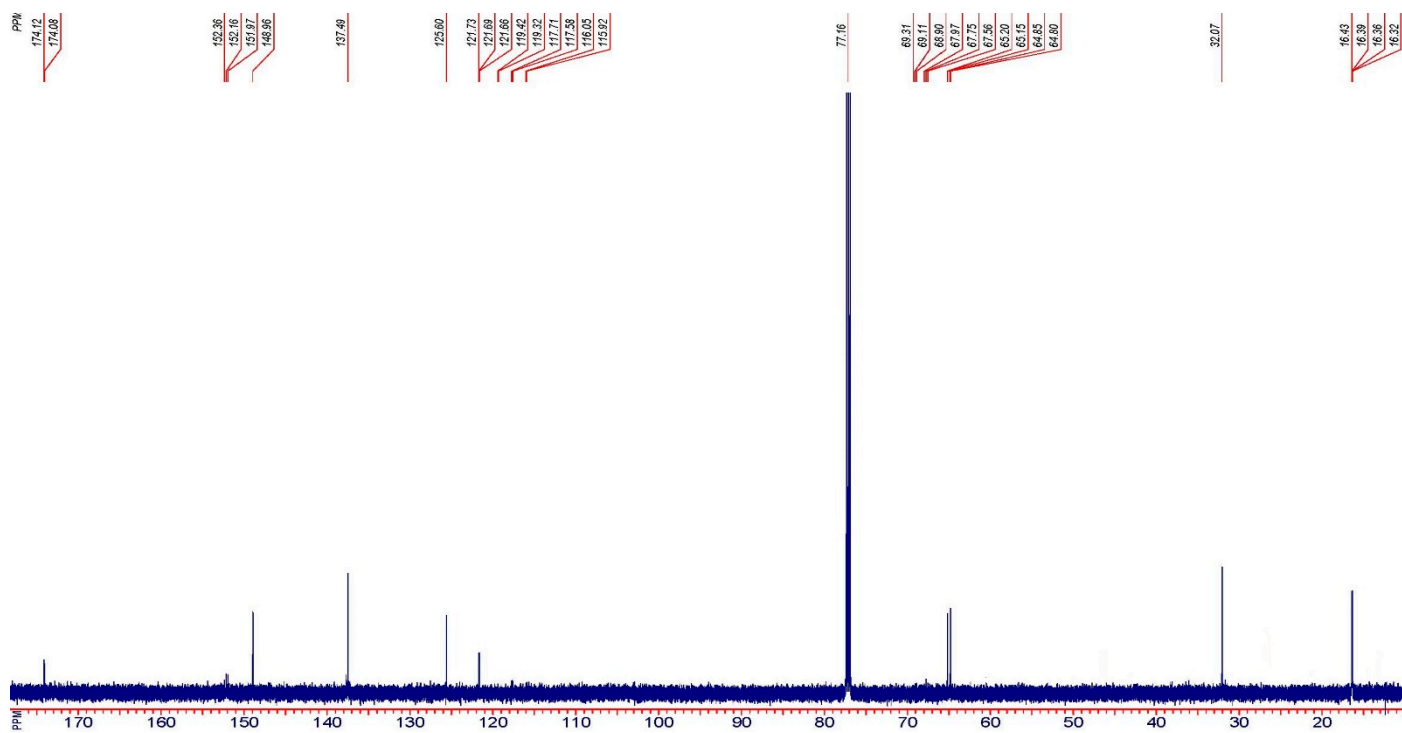<sup>13</sup>C NMR (150.8 MHz, CDCl<sub>3</sub>).

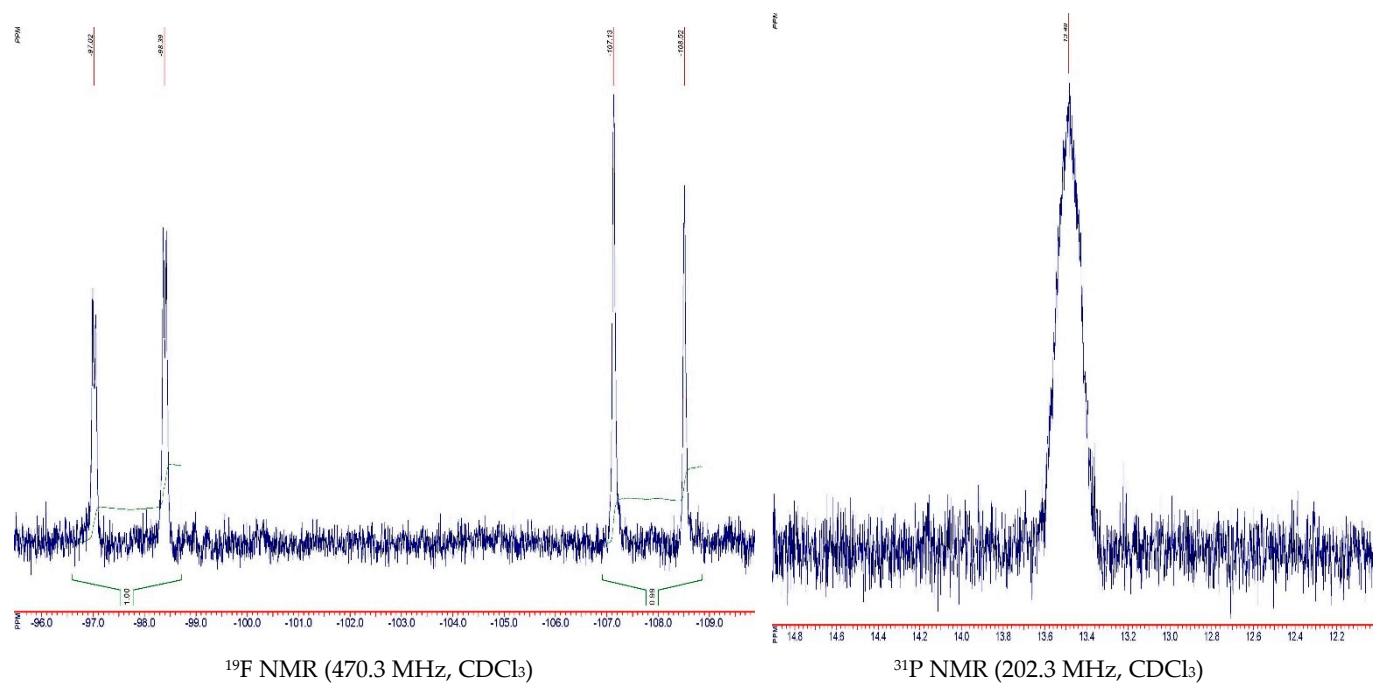

*Diethyl (2-(difluoro(pyridin-3-yl)methyl)-4-oxothiazolidin-2-yl)phosphonate 11b*

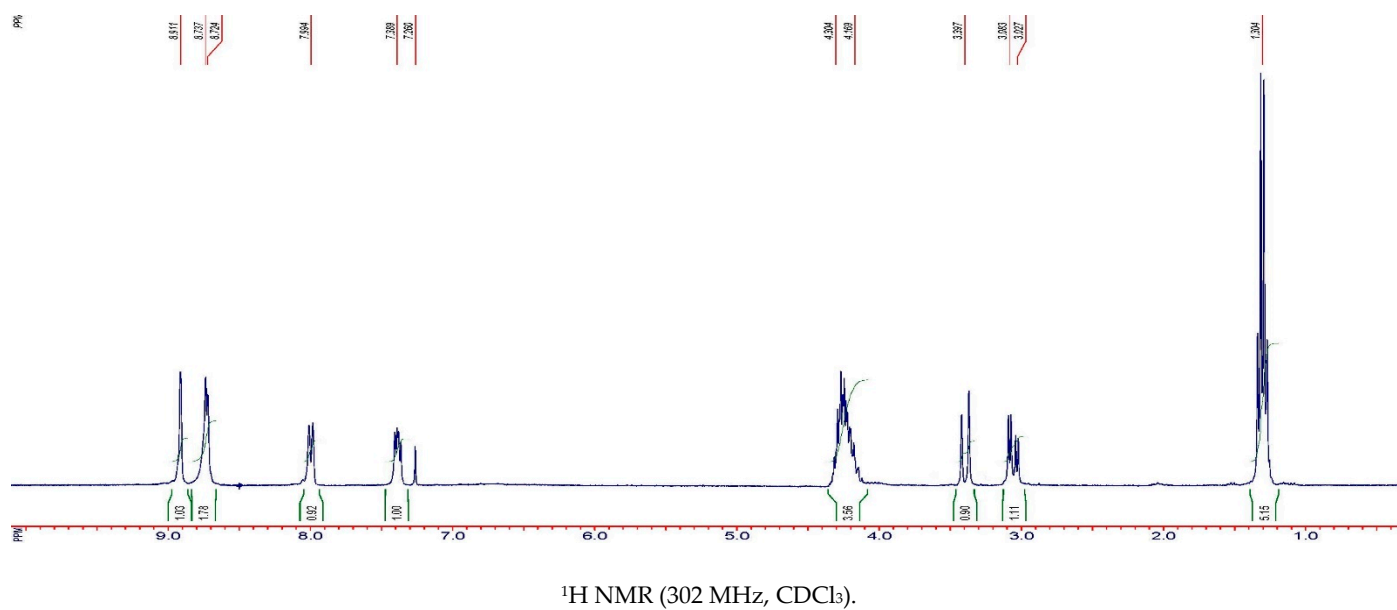

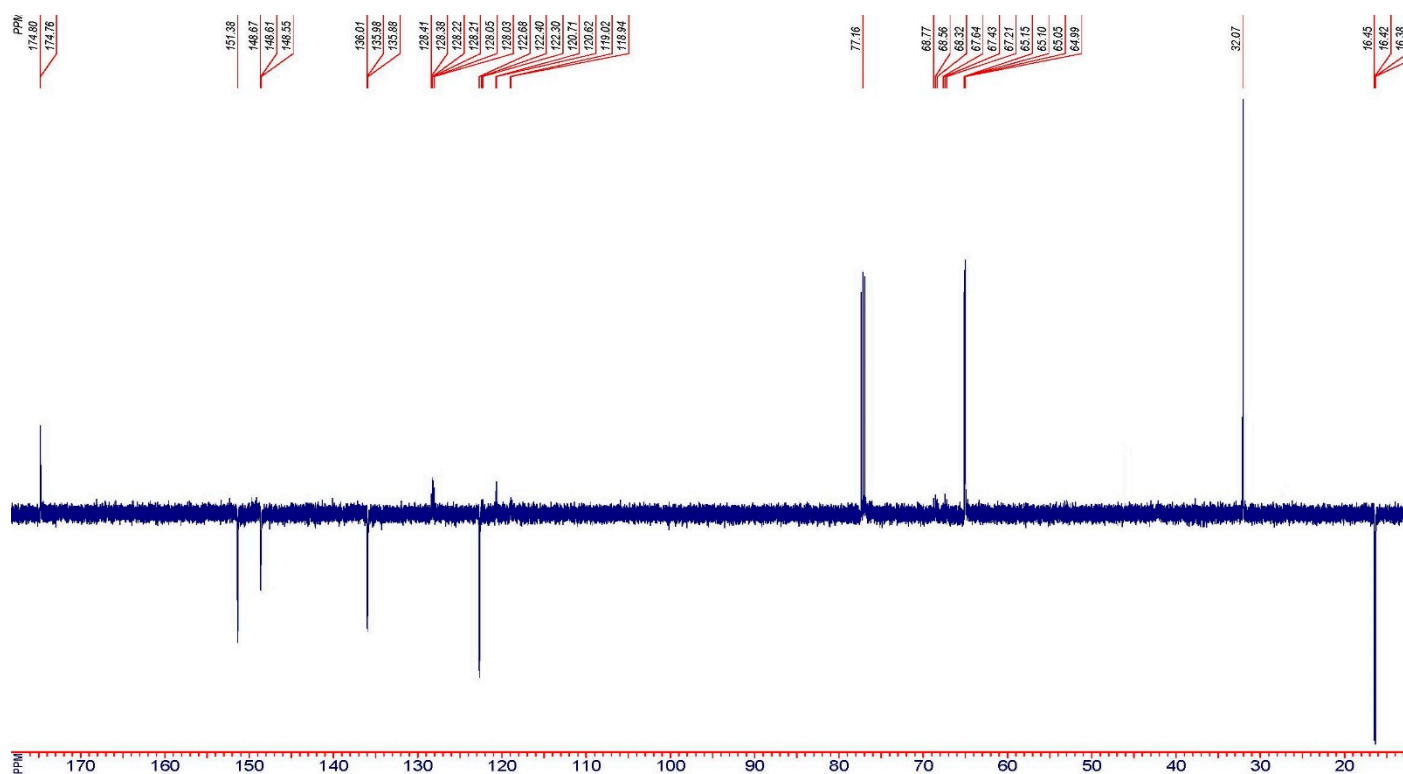

<sup>13</sup>C NMR\_APT (150.8 MHz, CDCl<sub>3</sub>).

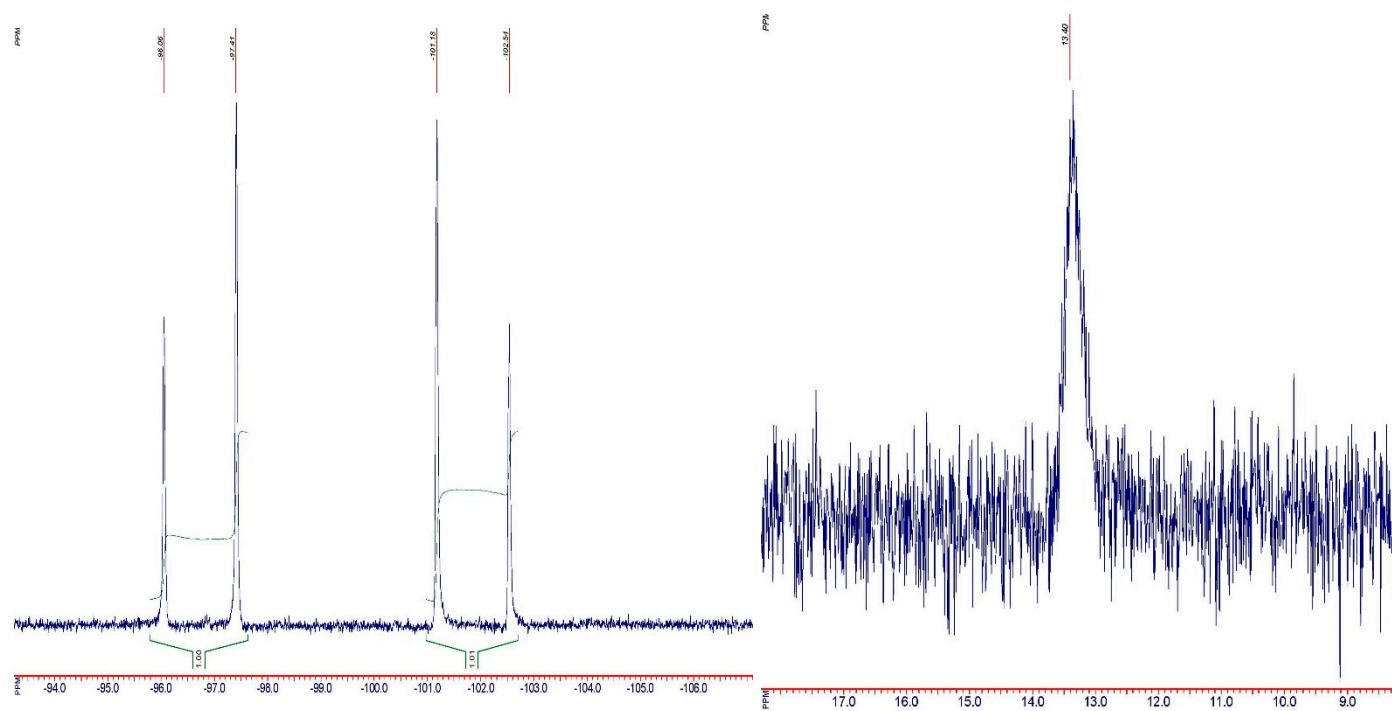

<sup>19</sup>F NMR (188 MHz, CDCl<sub>3</sub>)

<sup>31</sup>P NMR (202.3 MHz, CDCl<sub>3</sub>)



*Diethyl (2-(difluoro(pyridin-4-yl)methyl)-4-oxothiazolidin-2-yl)phosphonate 11c*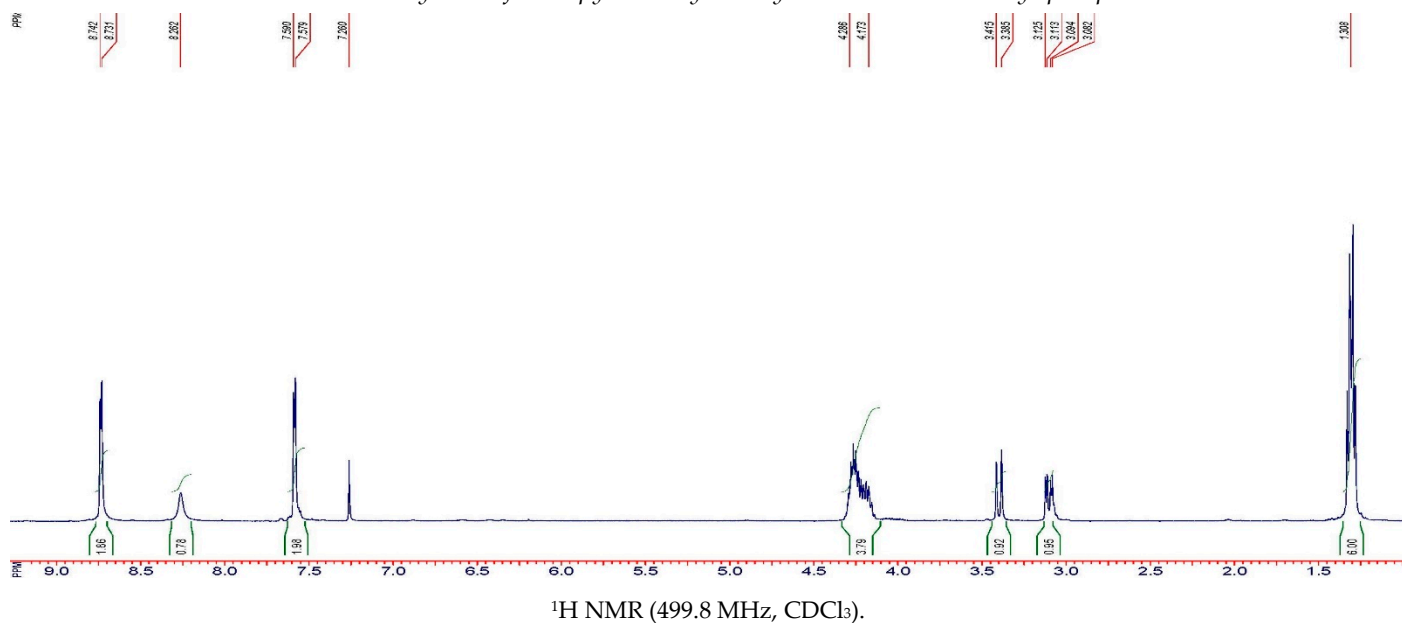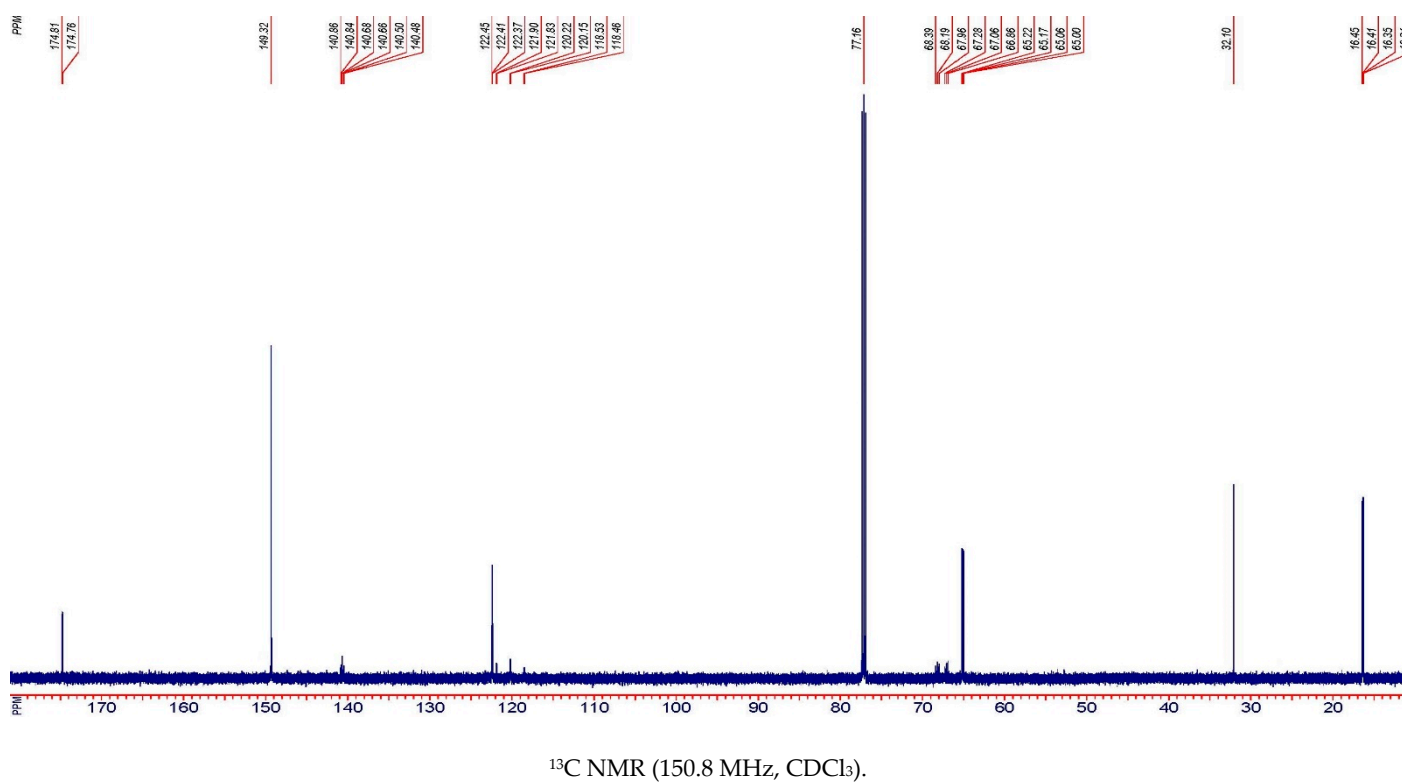

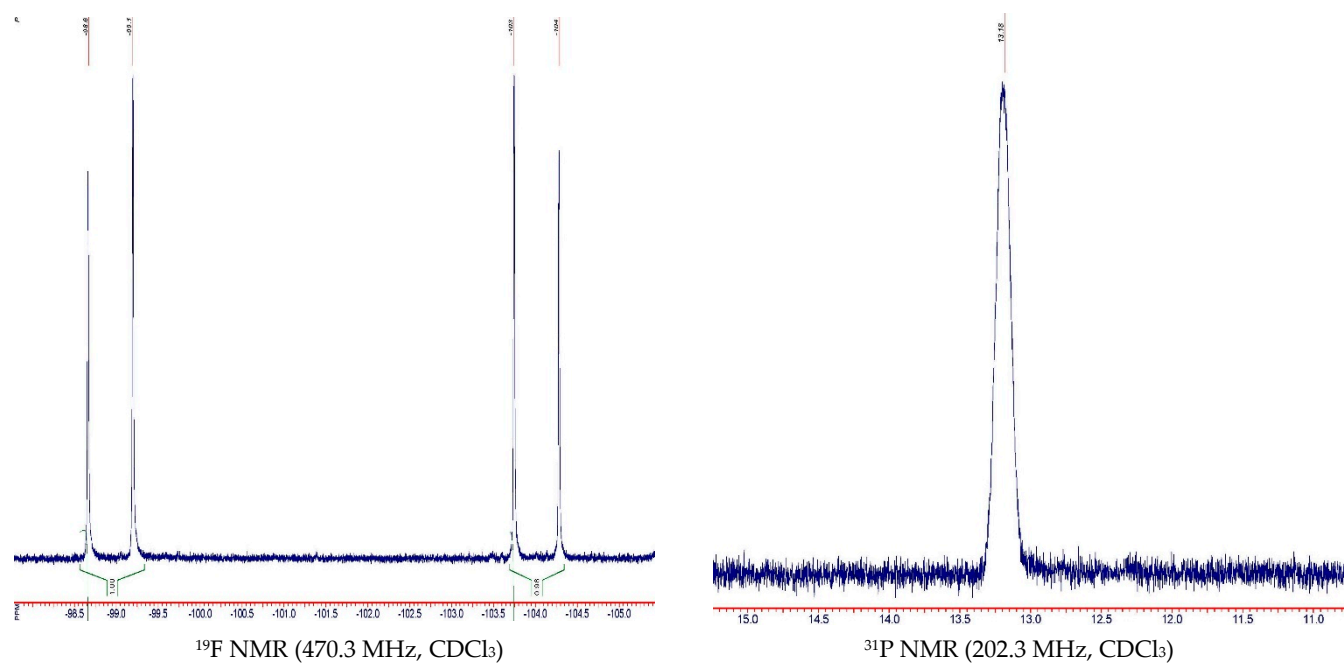

Diethyl (2-(difluoro(pyridine-2-yl)methyl)-4-oxo-1,3-thiazinan-2-yl)phosphonate **12a**

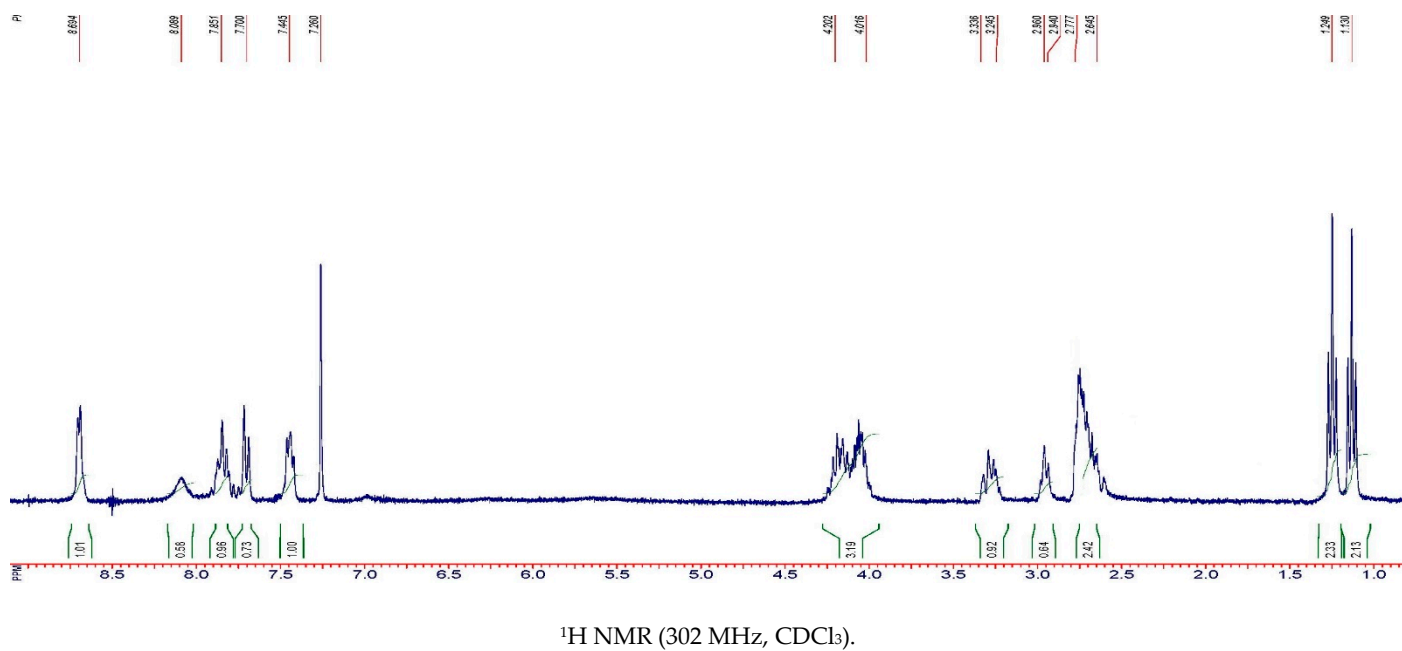

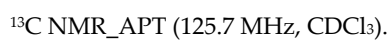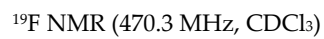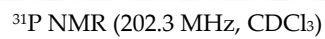

*Diethyl (2-(difluoro(pyridine-3-yl)methyl)-4-oxo-1,3-thiazinan-2-yl)phosphonate 12b*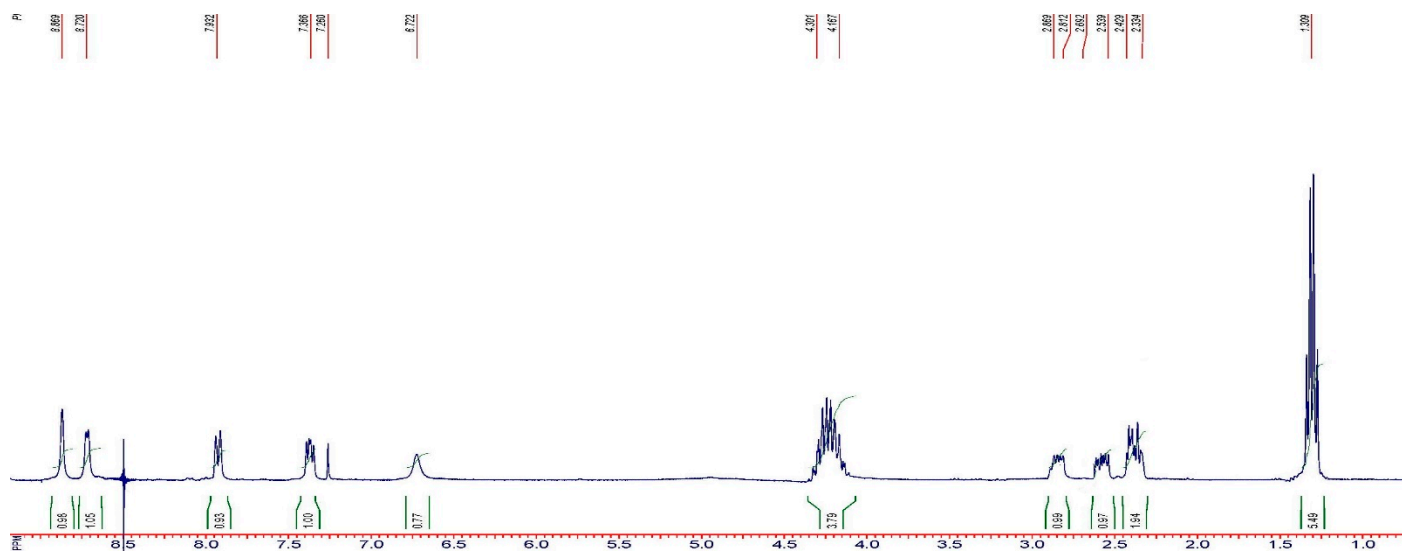<sup>1</sup>H NMR (400 MHz, CDCl<sub>3</sub>).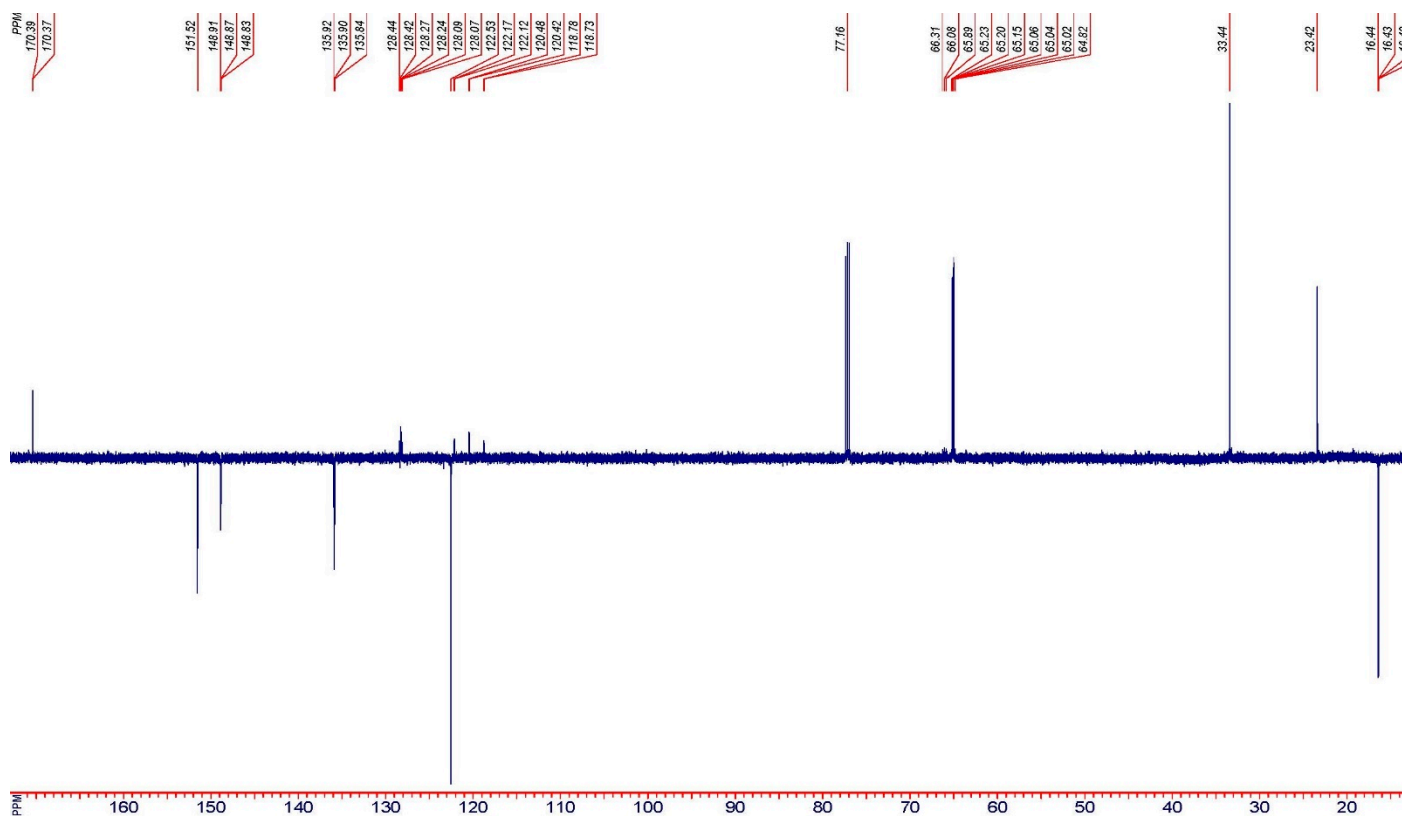<sup>13</sup>C NMR APT (150.8 MHz, CDCl<sub>3</sub>).

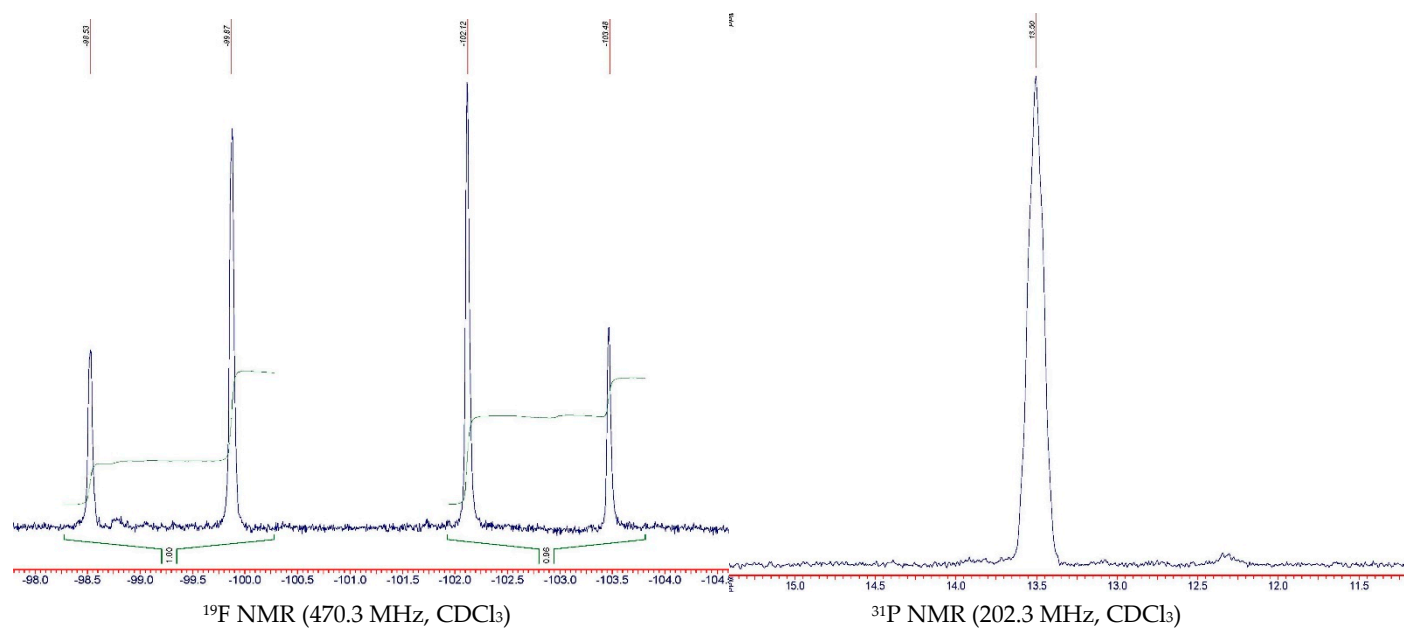

Diethyl (2-(difluoro(pyridine-4-yl)methyl)-4-oxo-1,3-thiazinan-2-yl)phosphonate **12c**

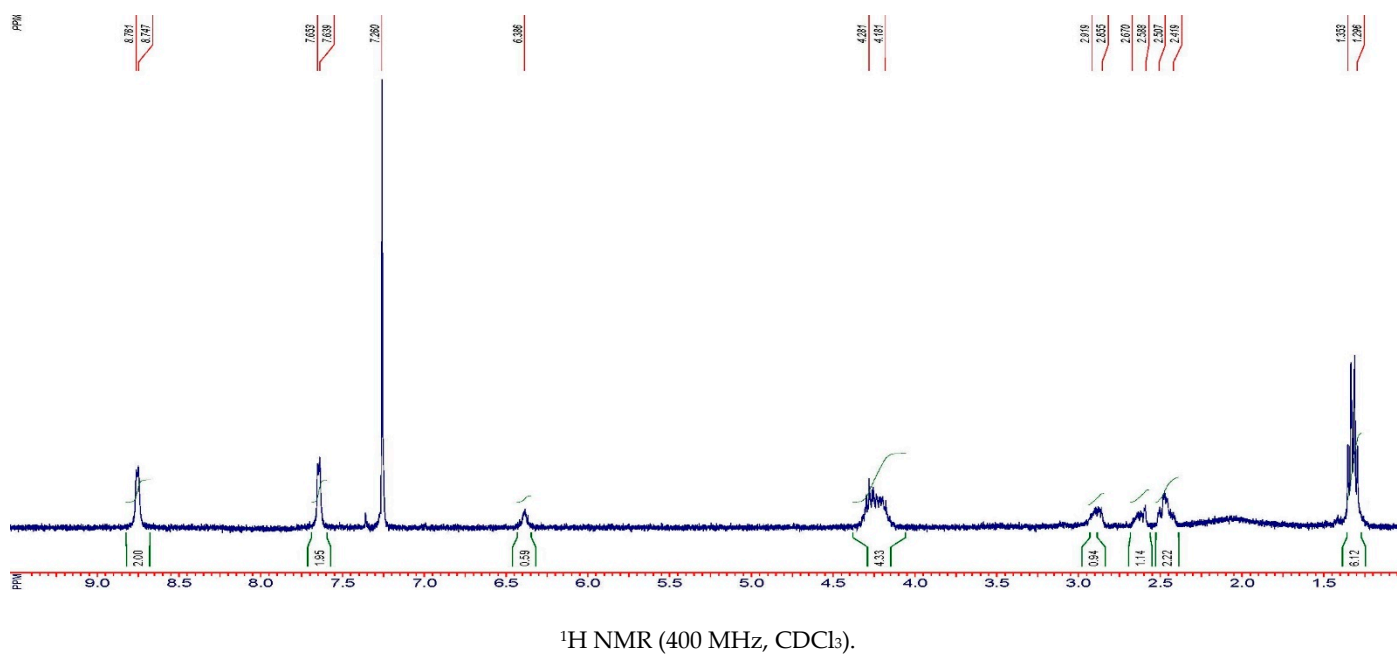

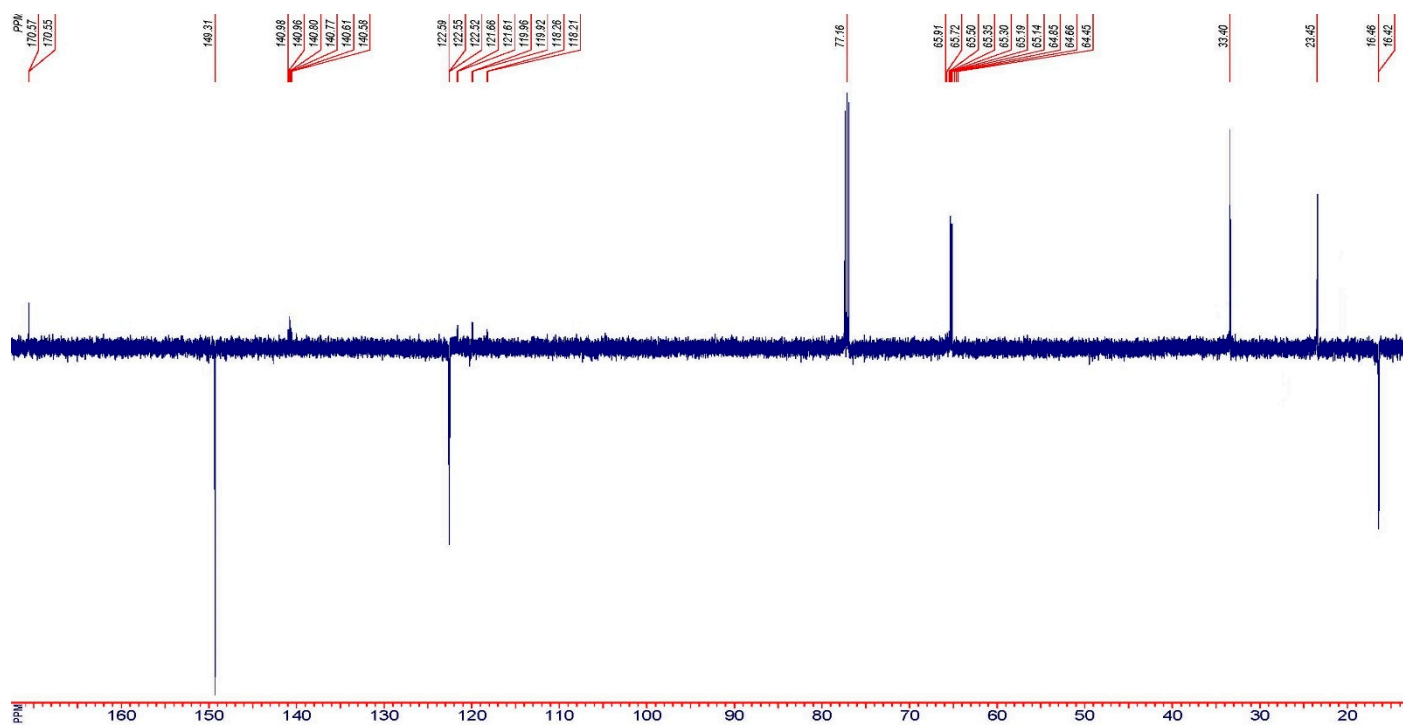

<sup>13</sup>C NMR\_APT (150.8 MHz, CDCl<sub>3</sub>).

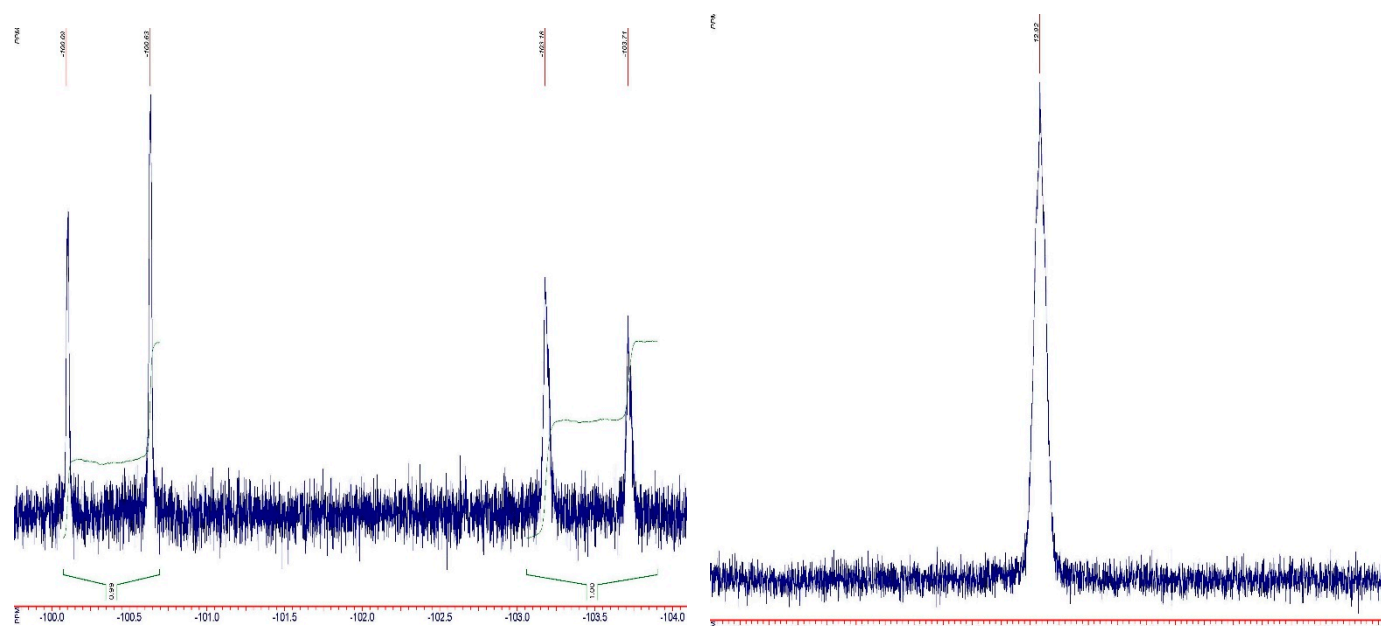

<sup>19</sup>F NMR (470.3 MHz, CDCl<sub>3</sub>)

<sup>31</sup>P NMR (202.3 MHz, CDCl<sub>3</sub>)
